# Supplementary material
Source: PubMed Central journal article supplement (PMC4325154)
Supplement: AEM.03709-14_zam999116068so1.pdf [file AEM.03709-14_zam999116068so1.pdf]

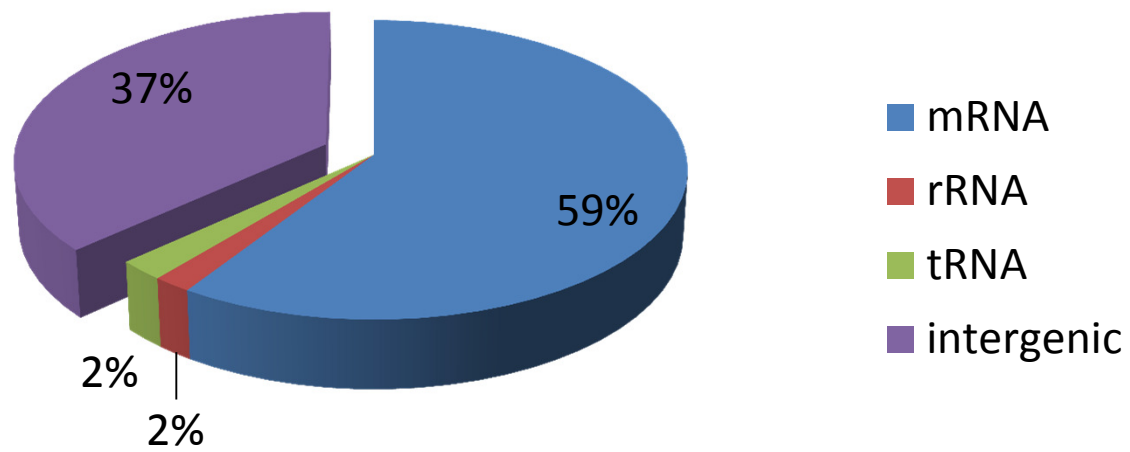

**Supplementary Figure 1.** Deep sequencing reads distribution.

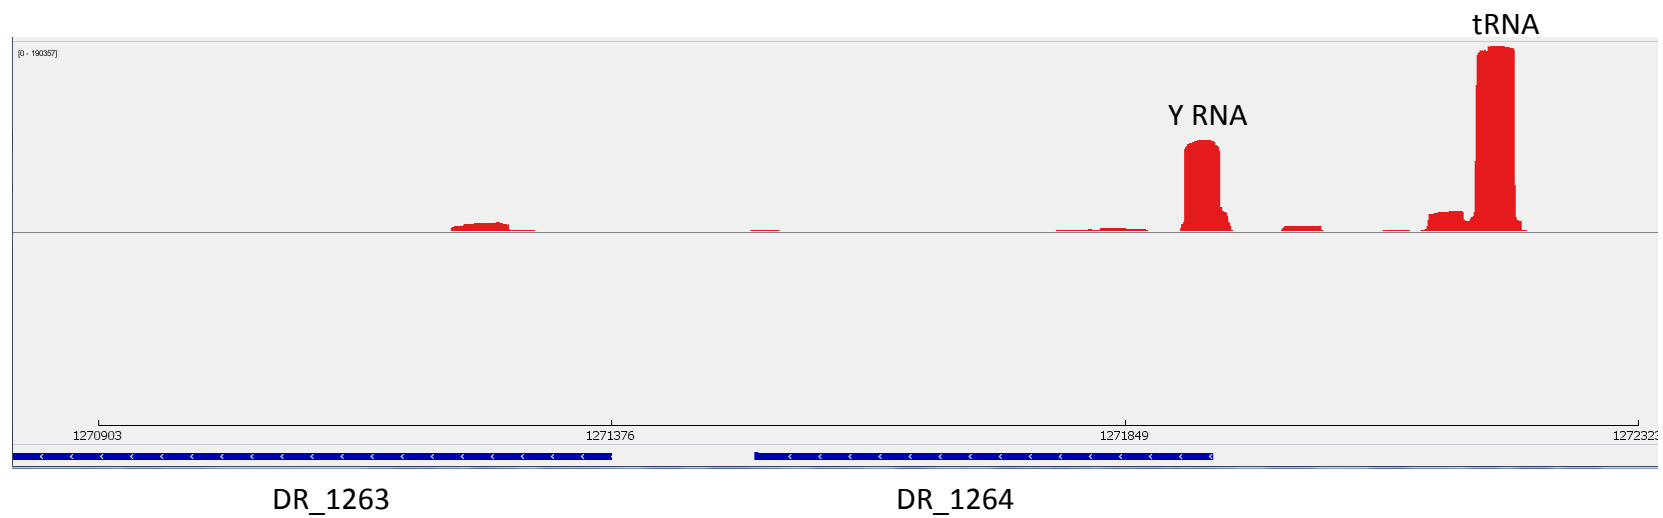

**Supplementary Figure 2.** Expression of the Y RNA was confirmed with the deep-seq data.

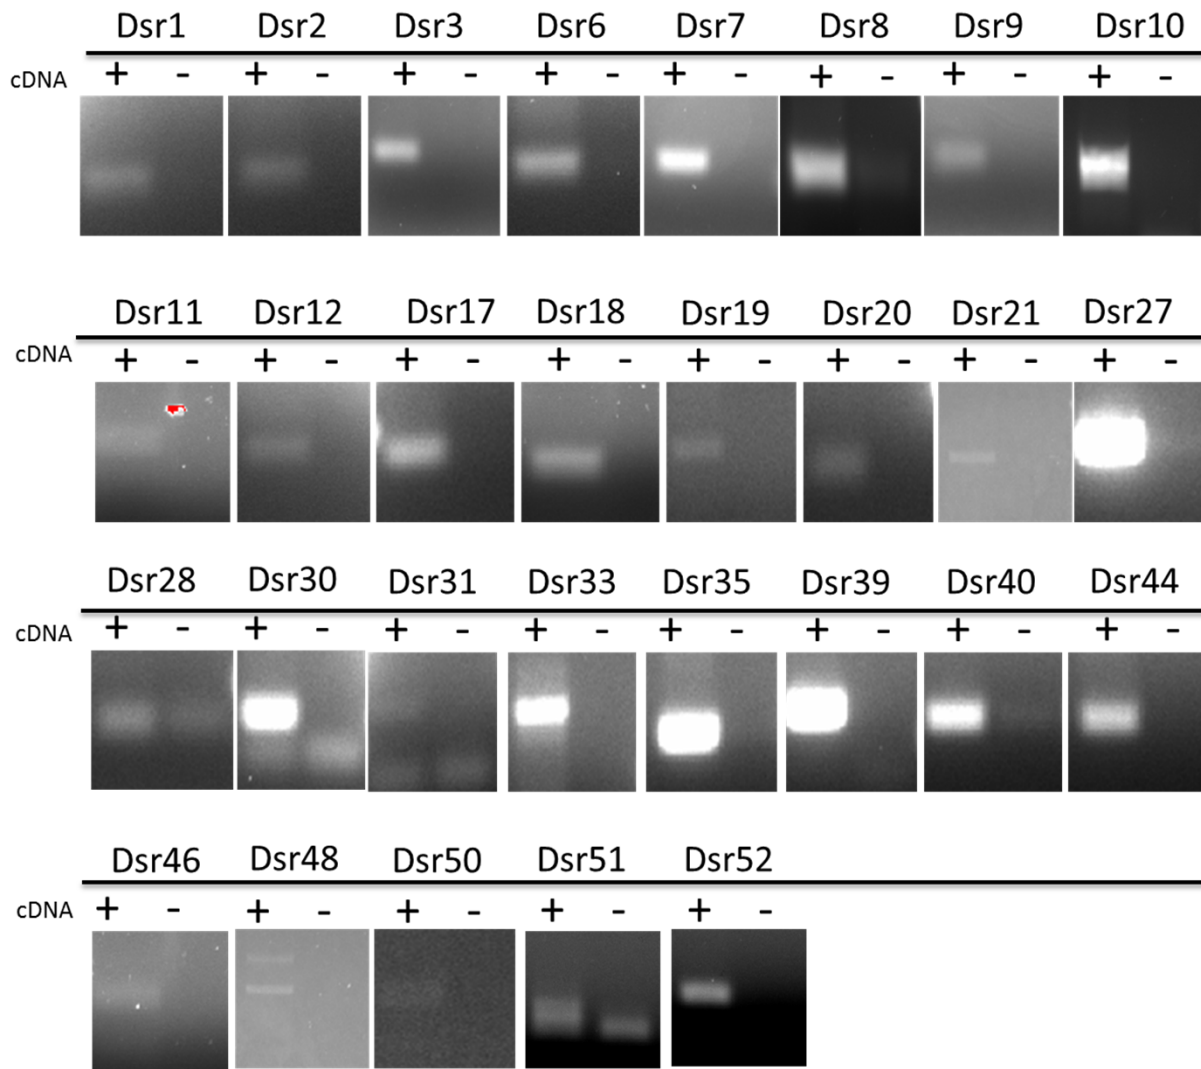

**Supplementary Figure 3.** RT-PCR for sRNAs identified in *D. radiodurans*.

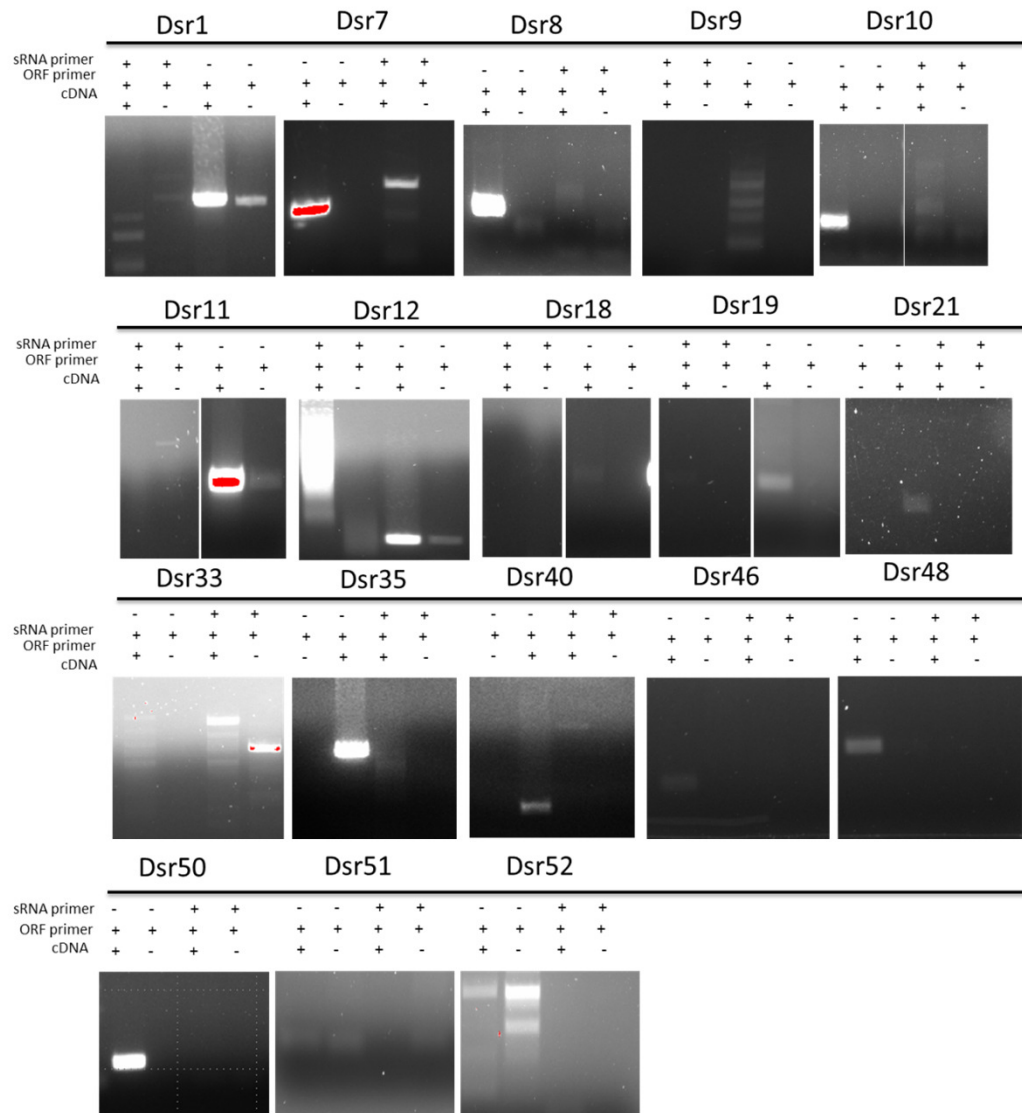

**Supplementary Figure 4.** RT-PCR for sRNA co-transcription verification.

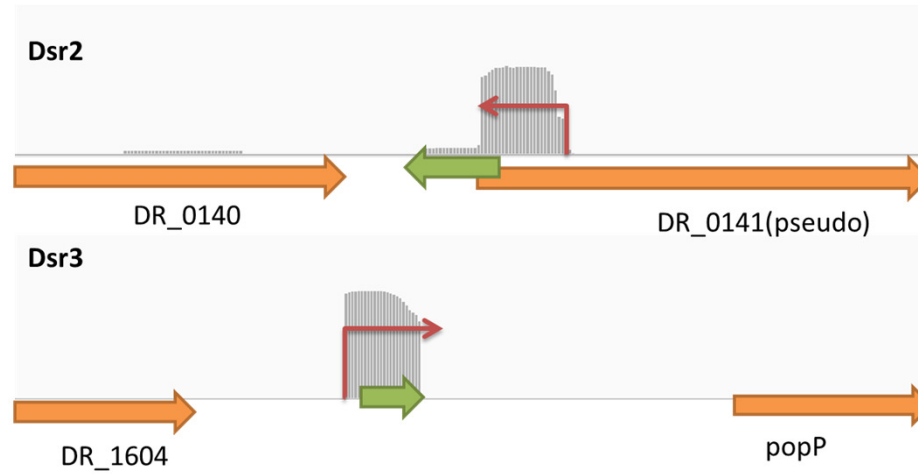

**Supplementary Figure 5.** Selected examples of transcription starting sites identified by 5' Deep-RACE.

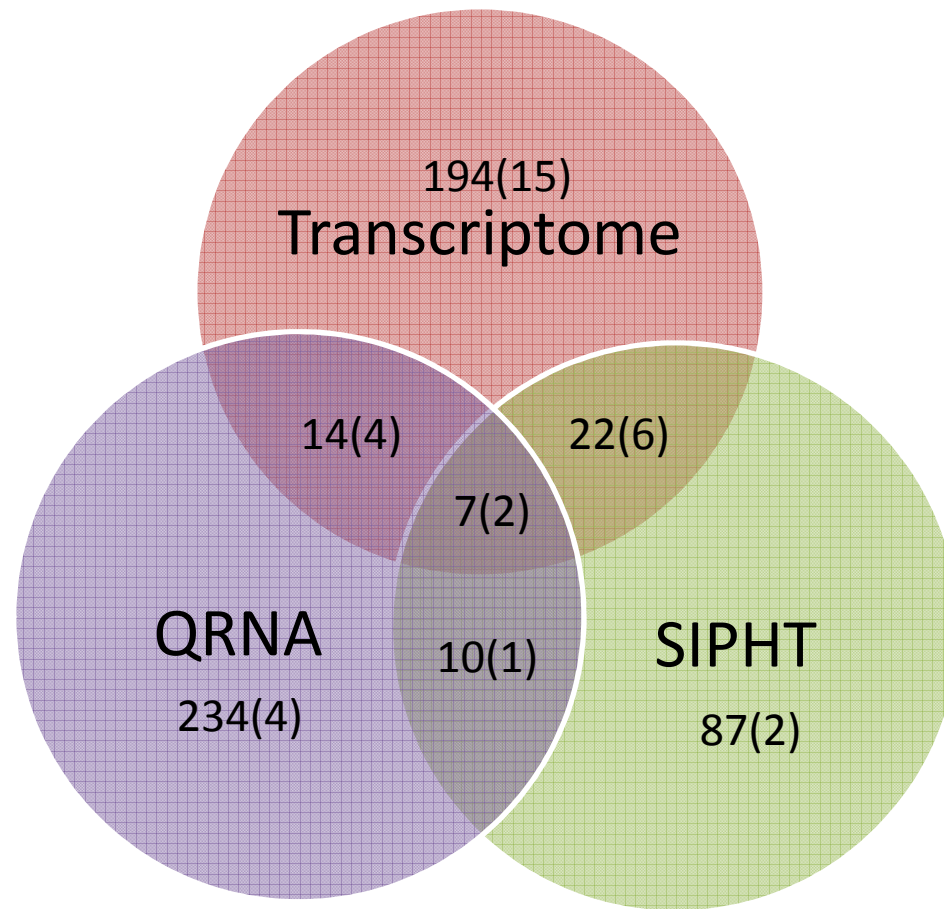

**Supplementary Figure 6.** Venn diagram of computational predicted sRNA candidates and deep-sequencing identified (transcriptome) sRNA candidates in *D. radiodurans*. The numbers indicate the sRNA candidates that were predicted using each method, with the numbers of sRNA confirmed by Northern blotting analysis in parentheses.

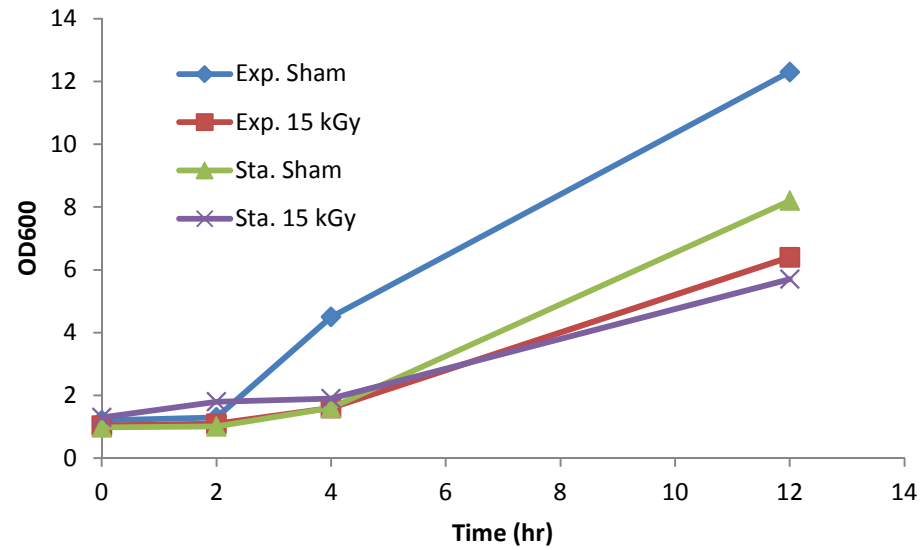

| Survival rate (CFU) | 15 kGy after 2hrs |
|---------------------|-------------------|
| exponential cells   | 8.13E-02          |
| stationary cells    | 1.38E-02          |

**Supplementary Figure 7.** Cells survival rate after 15 kGy irradiation.

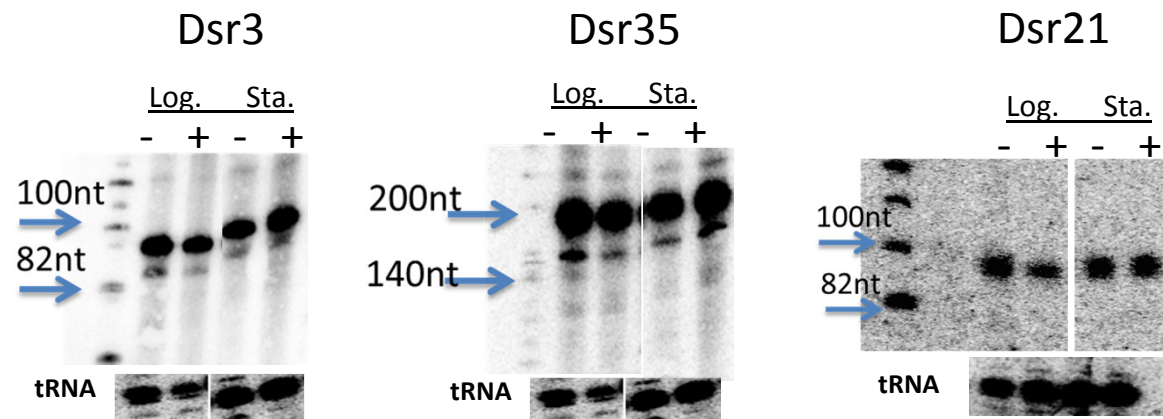

**Supplementary Figure 8.** Selected sRNAs of non-differential expression of. In each Northern blotting image. The left two lanes are RNA samples from exponential phase ( $OD_{600} = 1$ ) cells, and the right two lanes are from stationary phase ( $OD_{600} = 3$ ) cells. The first and third lanes are the control (sham irradiation) RNA samples, and the second and fourth lanes are the 15kGy irradiated RNA samples. The images of first two lanes and last two lanes are cut from the same gel in different parts. The band intensity change of each candidate is normalized to tRNA levels showed at the bottom of each blot.



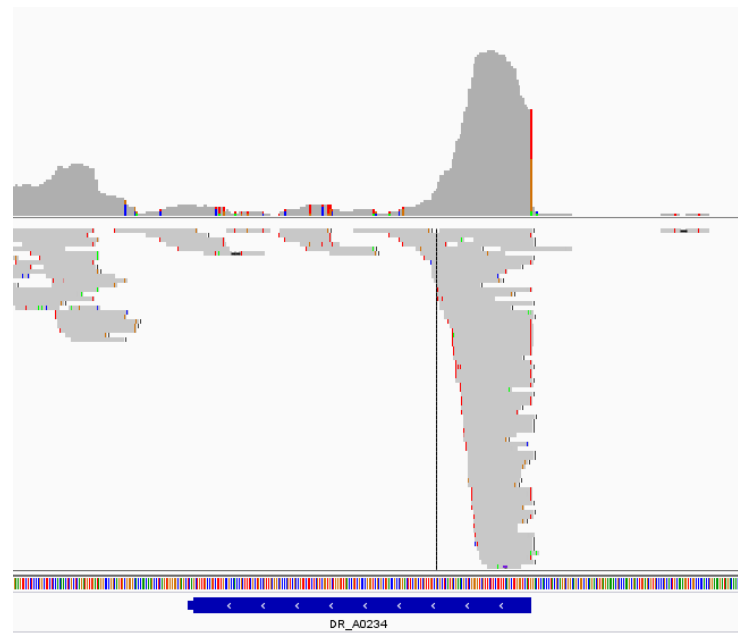

**Supplementary Figure 9.** Expression of DR\_A0234 is confirmed with the deep sequencing analysis.

## Supplementary Table 1A. Predicted sRNAs by QRNA

| family | genome                      | 5'     | 3'     | Size | adjacent genes       |
|--------|-----------------------------|--------|--------|------|----------------------|
| 18286  | gi 15805042 ref NC_001263.1 | 7806   | 7823   | 17   | >DRA0007~DRA0008>    |
| 18065  | gi 15805042 ref NC_001263.1 | 19144  | 19160  | 16   | <DR0019~DR0020>      |
| 18080  | gi 15805042 ref NC_001263.1 | 20644  | 20661  | 17   | >DR0020~DR0021>      |
| 18188  | gi 15805042 ref NC_001263.1 | 26109  | 26126  | 17   | >DR0026~DR0027<      |
| 18258  | gi 15805042 ref NC_001263.1 | 26631  | 26651  | 20   | >DRA0024~DRA0025>    |
| 9394   | gi 15805042 ref NC_001263.1 | 34724  | 34744  | 20   | >DRA0031~DRA0032>    |
| 17953  | gi 15805042 ref NC_001263.1 | 36102  | 36123  | 21   | >DR0035~DR0036>      |
| 16060  | gi 15805042 ref NC_001263.1 | 43484  | 43498  | 14   | >DRA0038~DRA0039>    |
| 18203  | gi 15805042 ref NC_001263.1 | 44569  | 44596  | 27   | >DR0045~DR0046>      |
| 11124  | gi 15805042 ref NC_001263.1 | 46095  | 46114  | 19   | >DR0048~DR0049>      |
| 17506  | gi 15805042 ref NC_001263.1 | 54681  | 54697  | 16   | <DR0058~DR0059>      |
| 18285  | gi 15805042 ref NC_001263.1 | 60562  | 60585  | 23   | >tRNA-Met-3~DRA0056< |
| 17631  | gi 15805042 ref NC_001263.1 | 63260  | 63320  | 60   | >DR0065~DR0066<      |
| 5792   | gi 15805042 ref NC_001263.1 | 66724  | 66744  | 20   | >DR0070~DR0071<      |
| 11733  | gi 15805042 ref NC_001263.1 | 69330  | 69346  | 16   | <DRA0063~DRA0064<    |
| 5592   | gi 15805042 ref NC_001263.1 | 72625  | 72671  | 46   | <DR0074~DR0075>      |
| 18232  | gi 15805042 ref NC_001263.1 | 83035  | 83051  | 16   | <DR0082~DR0083<      |
| 5798   | gi 15805042 ref NC_001263.1 | 95529  | 95574  | 45   | >DR0094~DR0095<      |
| 18248  | gi 15805042 ref NC_001263.1 | 99279  | 99294  | 15   | <DR0096~DR0097<      |
| 18000  | gi 15805042 ref NC_001263.1 | 119538 | 119554 | 16   | <DR0120~DR0121<      |
| 18251  | gi 15805042 ref NC_001263.1 | 126414 | 126430 | 16   | <DRA0127~DRA0128<    |
| 18011  | gi 15805042 ref NC_001263.1 | 136869 | 136886 | 17   | >DR0138~DR0139>      |
| 18023  | gi 15805042 ref NC_001263.1 | 146162 | 146192 | 30   | >tRNA-Arg-1~DR0147<  |
| 18025  | gi 15805042 ref NC_001263.1 | 147078 | 147095 | 17   | <DR0147~DR0148<      |
| 16775  | gi 15805042 ref NC_001263.1 | 153639 | 153670 | 31   | <DR0152~DR0153>      |
| 18032  | gi 15805042 ref NC_001263.1 | 153714 | 153731 | 17   | <DR0152~DR0153>      |
| 18252  | gi 15805042 ref NC_001263.1 | 169771 | 169787 | 16   | >DRA0166~DRA0167>    |
| 16374  | gi 15805042 ref NC_001263.1 | 183012 | 183043 | 31   | <DR0182~DR0183<      |
| 18253  | gi 15805042 ref NC_001263.1 | 188528 | 188550 | 22   | >DRA0182~DRA0183<    |
| 2354   | gi 15805042 ref NC_001263.1 | 188979 | 189051 | 72   | 1 >DR0184~DR0185>    |
| 18254  | gi 15805042 ref NC_001263.1 | 193786 | 193846 | 60   | >DRA0186~DRA0188<    |
| 17694  | gi 15805042 ref NC_001263.1 | 194167 | 194191 | 24   | >DRA0186~DRA0188<    |

|       |                             |        |        |                            |
|-------|-----------------------------|--------|--------|----------------------------|
| 5569  | gi 15805042 ref NC_001263.1 | 201410 | 201453 | 43 <DR0196~DR0197<         |
| 18075 | gi 15805042 ref NC_001263.1 | 202886 | 202902 | 16 <DR0198~DR0199<         |
| 18087 | gi 15805042 ref NC_001263.1 | 213117 | 213133 | 16 <DR0211~DR0212<         |
| 18093 | gi 15805042 ref NC_001263.1 | 216870 | 216951 | 81 <DR0215~DR0216<         |
| 5632  | gi 15805042 ref NC_001263.1 | 222561 | 222585 | 24 >DR0221~DR0222<         |
| 18256 | gi 15805042 ref NC_001263.1 | 223427 | 223446 | 19 >DRA0212~DRA0213>       |
| 18130 | gi 15805042 ref NC_001263.1 | 236456 | 236479 | 23 >DR0238~DR0239>         |
| 18131 | gi 15805042 ref NC_001263.1 | 237362 | 237382 | 20 >DR0239~DR0240<         |
| 16730 | gi 15805042 ref NC_001263.1 | 248253 | 248304 | 51 >DR0251~DR0252>         |
| 17006 | gi 15805042 ref NC_001263.1 | 250450 | 250470 | 20 <tRNA-Asp-3~DRrnaC23S>  |
| 16460 | gi 15805042 ref NC_001263.1 | 250502 | 250524 | 22 <tRNA-Asp-3~DRrnaC23S>  |
| 18154 | gi 15805042 ref NC_001263.1 | 251149 | 251194 | 45 <tRNA-Asp-3~DRrnaC23S>  |
| 18155 | gi 15805042 ref NC_001263.1 | 251394 | 251462 | 68 <tRNA-Asp-3~DRrnaC23S>  |
| 16686 | gi 15805042 ref NC_001263.1 | 251597 | 251668 | 71 <tRNA-Asp-3~DRrnaC23S>  |
| 18158 | gi 15805042 ref NC_001263.1 | 252144 | 252302 | 158 <tRNA-Asp-3~DRrnaC23S> |
| 5464  | gi 15805042 ref NC_001263.1 | 254037 | 254174 | 137 <DR0255~DRrnaC5S>      |
| 18161 | gi 15805042 ref NC_001263.1 | 254677 | 254703 | 26 1 >tRNA-Gly-3~DR0256<   |
| 18257 | gi 15805042 ref NC_001263.1 | 262596 | 262614 | 18 >DRA0249~DRA0250<       |
| 11562 | gi 15805042 ref NC_001263.1 | 263462 | 263492 | 30 <DR0261~DR0262>         |
| 5758  | gi 15805042 ref NC_001263.1 | 267627 | 267650 | 23 >DRA0254~DRA0255<       |
| 18189 | gi 15805042 ref NC_001263.1 | 269777 | 269793 | 16 <moaA~DR0267<           |
| 18260 | gi 15805042 ref NC_001263.1 | 270232 | 270253 | 21 <DRA0255~DRA0256<       |
| 18261 | gi 15805042 ref NC_001263.1 | 272359 | 272372 | 13 <DRA0257~DRA0258<       |
| 18262 | gi 15805042 ref NC_001263.1 | 288499 | 288553 | 54 <DRA0268~DRA0269<       |
| 18264 | gi 15805042 ref NC_001263.1 | 290636 | 290652 | 16 <DRA0270~DRA0271>       |
| 18190 | gi 15805042 ref NC_001263.1 | 299625 | 299643 | 18 <DR0297~DR0298<         |
| 18265 | gi 15805042 ref NC_001263.1 | 303175 | 303192 | 17 >DRA0280~DRA0281>       |
| 11341 | gi 15805042 ref NC_001263.1 | 304807 | 304823 | 16 >DR0302~pgm>            |
| 18266 | gi 15805042 ref NC_001263.1 | 309400 | 309421 | 21 >DRA0285~DRA0286>       |
| 18267 | gi 15805042 ref NC_001263.1 | 315203 | 315225 | 22 >DRA0290~DRA0291>       |
| 18278 | gi 15805042 ref NC_001263.1 | 316674 | 316693 | 19 >DRA0292~DRA0293>       |
| 18279 | gi 15805042 ref NC_001263.1 | 321044 | 321060 | 16 <DRA0295~DRA0296<       |
| 18191 | gi 15805042 ref NC_001263.1 | 331017 | 331034 | 17 <DR0334~DR0335>         |
| 17805 | gi 15805042 ref NC_001263.1 | 334307 | 334322 | 15 <DR0336~DR0337<         |

|       |                             |        |        |                        |
|-------|-----------------------------|--------|--------|------------------------|
| 17690 | gi 15805042 ref NC_001263.1 | 344615 | 344639 | 24 <DR0346~DR0347<     |
| 16334 | gi 15805042 ref NC_001263.1 | 346123 | 346139 | 16 <DR0348~DR0349>     |
| 18193 | gi 15805042 ref NC_001263.1 | 350767 | 350784 | 17 <DR0350~DR0351<     |
| 18194 | gi 15805042 ref NC_001263.1 | 351503 | 351519 | 16 <DR0351~DR0352<     |
| 11293 | gi 15805042 ref NC_001263.1 | 352076 | 352123 | 47 <DR0352~DR0353<     |
| 18196 | gi 15805042 ref NC_001263.1 | 355149 | 355168 | 19 <DR0353~DR0354<     |
| 18280 | gi 15805042 ref NC_001263.1 | 358664 | 358681 | 17 >DRA0330~DRA0331>   |
| 18281 | gi 15805042 ref NC_001263.1 | 361880 | 361897 | 17 >DRA0332~DRA0333>   |
| 18282 | gi 15805042 ref NC_001263.1 | 367792 | 367806 | 14 >DRA0335~DRA0336<   |
| 18198 | gi 15805042 ref NC_001263.1 | 394863 | 394880 | 17 >DR0394~DR0395>     |
| 18283 | gi 15805042 ref NC_001263.1 | 395388 | 395409 | 21 >DRA0354~DRA0355>   |
| 18284 | gi 15805042 ref NC_001263.1 | 395912 | 395929 | 17 >DRA0354~DRA0355>   |
| 18199 | gi 15805042 ref NC_001263.1 | 431326 | 431342 | 16 >DR0432~DR0433>     |
| 18200 | gi 15805042 ref NC_001263.1 | 435820 | 435843 | 23 >DR0437~DR0438>     |
| 18201 | gi 15805042 ref NC_001263.1 | 437897 | 437914 | 17 >DR0441~DR0442<     |
| 18202 | gi 15805042 ref NC_001263.1 | 438036 | 438051 | 15 >DR0441~DR0442<     |
| 17691 | gi 15805042 ref NC_001263.1 | 454851 | 454875 | 24 >DR0459~DR0460<     |
| 18205 | gi 15805042 ref NC_001263.1 | 458694 | 458721 | 27 >DR0462~DR0463<     |
| 18207 | gi 15805042 ref NC_001263.1 | 463637 | 463654 | 17 <DR0464~DR0465<     |
| 18208 | gi 15805042 ref NC_001263.1 | 473283 | 473298 | 15 >DR0472~DR0473<     |
| 18209 | gi 15805042 ref NC_001263.1 | 490926 | 490945 | 19 <DR0487~DR0488<     |
| 75    | gi 15805042 ref NC_001263.1 | 498304 | 498329 | 25 >DR0497~tRNA-Val-1< |
| 18211 | gi 15805042 ref NC_001263.1 | 502175 | 502199 | 24 7 >DR0500~DR0501<   |
| 5788  | gi 15805042 ref NC_001263.1 | 518411 | 518434 | 23 >tRNA-Arg-3~DR0513< |
| 18212 | gi 15805042 ref NC_001263.1 | 520954 | 520971 | 17 <DR0514~DR0515<     |
| 5790  | gi 15805042 ref NC_001263.1 | 553089 | 553113 | 24 >DR0547~DR0548<     |
| 18213 | gi 15805042 ref NC_001263.1 | 567738 | 567754 | 16 <DR0560~DR0561>     |
| 18214 | gi 15805042 ref NC_001263.1 | 577139 | 577155 | 16 >tRNA-Val-3~DR0569> |
| 18215 | gi 15805042 ref NC_001263.1 | 578578 | 578595 | 17 >DR0569~DR0570>     |
| 17379 | gi 15805042 ref NC_001263.1 | 610192 | 610208 | 16 <DR0597~DR0598>     |
| 18218 | gi 15805042 ref NC_001263.1 | 639346 | 639362 | 16 >DR0624~DR0625>     |
| 18219 | gi 15805042 ref NC_001263.1 | 664020 | 664036 | 16 <DR0652~DR0653<     |
| 17772 | gi 15805042 ref NC_001263.1 | 669477 | 669500 | 23 >DR0657~DR0658<     |
| 17550 | gi 15805042 ref NC_001263.1 | 676597 | 676614 | 17 <DR0667~DR0668<     |

|       |                             |         |         |    |                     |
|-------|-----------------------------|---------|---------|----|---------------------|
| 18221 | gi 15805042 ref NC_001263.1 | 694321  | 694336  | 15 | >DR0685~DR0686>     |
| 18222 | gi 15805042 ref NC_001263.1 | 732025  | 732041  | 16 | <icsA~DR0714<       |
| 18223 | gi 15805042 ref NC_001263.1 | 732103  | 732123  | 20 | <icsA~DR0714<       |
| 18225 | gi 15805042 ref NC_001263.1 | 747854  | 747870  | 16 | <DR0731~DR0732>     |
| 18226 | gi 15805042 ref NC_001263.1 | 750899  | 750915  | 16 | >DR0736~DR0737>     |
| 17692 | gi 15805042 ref NC_001263.1 | 754343  | 754369  | 26 | >DR0739~DR0740>     |
| 18228 | gi 15805042 ref NC_001263.1 | 774373  | 774389  | 16 | <DR0758~DR0759>     |
| 18229 | gi 15805042 ref NC_001263.1 | 794782  | 794800  | 18 | >DR0777~DR0778>     |
| 17575 | gi 15805042 ref NC_001263.1 | 816261  | 816315  | 54 | <DR0802~DR0803<     |
| 18233 | gi 15805042 ref NC_001263.1 | 869158  | 869177  | 19 | >DR0857~DR0858>     |
| 18234 | gi 15805042 ref NC_001263.1 | 869158  | 869177  | 19 | >DR0857~DR0858>     |
| 18236 | gi 15805042 ref NC_001263.1 | 895642  | 895659  | 17 | >DR0883~DR0884>     |
| 18237 | gi 15805042 ref NC_001263.1 | 904620  | 904669  | 49 | >DR0896~DR0897<     |
| 5793  | gi 15805042 ref NC_001263.1 | 904780  | 904815  | 35 | >DR0896~DR0897<     |
| 18242 | gi 15805042 ref NC_001263.1 | 930713  | 930729  | 16 | >rpoD~DR0917>       |
| 18243 | gi 15805042 ref NC_001263.1 | 936633  | 936648  | 15 | <DR0921~tRNA-Leu-5< |
| 18244 | gi 15805042 ref NC_001263.1 | 936999  | 937015  | 16 | <tRNA-His-1~DR0922> |
| 5487  | gi 15805042 ref NC_001263.1 | 943591  | 943615  | 24 | >DR0928~DR0929<     |
| 18245 | gi 15805042 ref NC_001263.1 | 968039  | 968055  | 16 | >DR0955~DR0956<     |
| 17693 | gi 15805042 ref NC_001263.1 | 974238  | 974264  | 26 | >DR0960~DR0961<     |
| 17956 | gi 15805042 ref NC_001263.1 | 986234  | 986255  | 21 | >DR0968~DR0969<     |
| 18249 | gi 15805042 ref NC_001263.1 | 993277  | 993293  | 16 | <DR0976~DR0977>     |
| 17551 | gi 15805042 ref NC_001263.1 | 996424  | 996441  | 17 | <DR0979~DR0980>     |
| 17681 | gi 15805042 ref NC_001263.1 | 1008098 | 1008122 | 24 | >DR0990~DR0991<     |
| 17308 | gi 15805042 ref NC_001263.1 | 1009442 | 1009458 | 16 | <DR0991~DR0992>     |
| 17982 | gi 15805042 ref NC_001263.1 | 1015639 | 1015659 | 20 | >DR1000~DR1001<     |
| 17983 | gi 15805042 ref NC_001263.1 | 1026705 | 1026740 | 35 | <DR1014~DR1015<     |
| 17985 | gi 15805042 ref NC_001263.1 | 1029038 | 1029061 | 23 | >DR1016~DR1017>     |
| 10382 | gi 15805042 ref NC_001263.1 | 1029194 | 1029210 | 16 | >DR1016~DR1017>     |
| 17987 | gi 15805042 ref NC_001263.1 | 1050007 | 1050029 | 22 | <DR1037~DR1038<     |
| 17811 | gi 15805042 ref NC_001263.1 | 1057493 | 1057509 | 16 | >DR1045~DR1046>     |
| 17988 | gi 15805042 ref NC_001263.1 | 1066649 | 1066666 | 17 | <DR1055~DR1056<     |
| 5761  | gi 15805042 ref NC_001263.1 | 1073181 | 1073198 | 17 | >DR1061~DR1062<     |
| 17989 | gi 15805042 ref NC_001263.1 | 1077630 | 1077653 | 23 | <DR1066~DR1067<     |

|       |                             |         |         |    |                     |
|-------|-----------------------------|---------|---------|----|---------------------|
| 11364 | gi 15805042 ref NC_001263.1 | 1078045 | 1078061 | 16 | <DR1067~DR1068<     |
| 17491 | gi 15805042 ref NC_001263.1 | 1094918 | 1094968 | 50 | >DR1086~DR1087<     |
| 17990 | gi 15805042 ref NC_001263.1 | 1098088 | 1098108 | 20 | <DR1089~DR1090>     |
| 17991 | gi 15805042 ref NC_001263.1 | 1122227 | 1122244 | 17 | >DR1115~DR1116<     |
| 17992 | gi 15805042 ref NC_001263.1 | 1134578 | 1134598 | 20 | >DR1125~DR1126>     |
| 5652  | gi 15805042 ref NC_001263.1 | 1141622 | 1141646 | 24 | 9 <DR1131~DR1132<   |
| 17995 | gi 15805042 ref NC_001263.1 | 1172248 | 1172266 | 18 | >DR1161~DR1162<     |
| 17997 | gi 15805042 ref NC_001263.1 | 1180341 | 1180358 | 17 | <DR1171~DR1172<     |
| 17998 | gi 15805042 ref NC_001263.1 | 1187523 | 1187543 | 20 | <DR1176~DR1177>     |
| 17919 | gi 15805042 ref NC_001263.1 | 1193484 | 1193500 | 16 | >DR1184~DR1185<     |
| 17608 | gi 15805042 ref NC_001263.1 | 1224488 | 1224504 | 16 | <DR1216~DR1217>     |
| 18001 | gi 15805042 ref NC_001263.1 | 1228164 | 1228180 | 16 | <DR1220~DR1221<     |
| 18002 | gi 15805042 ref NC_001263.1 | 1251406 | 1251425 | 19 | >DR1244~DR1245<     |
| 17682 | gi 15805042 ref NC_001263.1 | 1259835 | 1259877 | 42 | >DR1254~DR1255<     |
| 5769  | gi 15805042 ref NC_001263.1 | 1302729 | 1302749 | 20 | >DR1295~DR1296>     |
| 17295 | gi 15805042 ref NC_001263.1 | 1309381 | 1309407 | 26 | >DR1302~DR1303>     |
| 18006 | gi 15805042 ref NC_001263.1 | 1312371 | 1312386 | 15 | >DR1305~DR1306<     |
| 5770  | gi 15805042 ref NC_001263.1 | 1331426 | 1331454 | 28 | >DR1325~DR1326>     |
| 18008 | gi 15805042 ref NC_001263.1 | 1332389 | 1332408 | 19 | >DR1326~DR1327>     |
| 14239 | gi 15805042 ref NC_001263.1 | 1346362 | 1346385 | 23 | >DR1338~DR1339<     |
| 18009 | gi 15805042 ref NC_001263.1 | 1350391 | 1350407 | 16 | <DR1343~DR1344>     |
| 18010 | gi 15805042 ref NC_001263.1 | 1361988 | 1362017 | 29 | >DR1354~DR1355>     |
| 4507  | gi 15805042 ref NC_001263.1 | 1377243 | 1377269 | 26 | <DR1371~DR1372>     |
| 17545 | gi 15805042 ref NC_001263.1 | 1389309 | 1389326 | 17 | <DR1382~DR1383<     |
| 16723 | gi 15805042 ref NC_001263.1 | 1389414 | 1389430 | 16 | <DR1382~DR1383<     |
| 18017 | gi 15805042 ref NC_001263.1 | 1406629 | 1406646 | 17 | <DR1403~DR1404<     |
| 18018 | gi 15805042 ref NC_001263.1 | 1406909 | 1406923 | 14 | <DR1404~DR1405<     |
| 18019 | gi 15805042 ref NC_001263.1 | 1418537 | 1418552 | 15 | <DR1416~DR1417<     |
| 18020 | gi 15805042 ref NC_001263.1 | 1422086 | 1422101 | 15 | <DR1418~DR1419<     |
| 18022 | gi 15805042 ref NC_001263.1 | 1423693 | 1423711 | 18 | >DR1420~DR1421>     |
| 17923 | gi 15805042 ref NC_001263.1 | 1481026 | 1481042 | 16 | >DR1470~DR1471>     |
| 18026 | gi 15805042 ref NC_001263.1 | 1485580 | 1485601 | 21 | >DR1472~tRNA-Thr-1< |
| 17543 | gi 15805042 ref NC_001263.1 | 1492455 | 1492470 | 15 | <DR1479~DR1480<     |
| 18028 | gi 15805042 ref NC_001263.1 | 1524927 | 1524947 | 20 | <DR1508~DR1509<     |

|       |                             |         |         |    |                   |
|-------|-----------------------------|---------|---------|----|-------------------|
| 18029 | gi 15805042 ref NC_001263.1 | 1526510 | 1526526 | 16 | <DR1510~DR1511<   |
| 18033 | gi 15805042 ref NC_001263.1 | 1542197 | 1542214 | 17 | <DR1525~DR1526<   |
| 4012  | gi 15805042 ref NC_001263.1 | 1543721 | 1543735 | 14 | >DR1527~DR1528>   |
| 18034 | gi 15805042 ref NC_001263.1 | 1572094 | 1572122 | 28 | <DR1553~DR1554<   |
| 18036 | gi 15805042 ref NC_001263.1 | 1577952 | 1577968 | 16 | >DR1558~DR1559>   |
| 16333 | gi 15805042 ref NC_001263.1 | 1582725 | 1582748 | 23 | <DR1563~DR1564<   |
| 5486  | gi 15805042 ref NC_001263.1 | 1607039 | 1607070 | 31 | <DR1586~DR1587<   |
| 17546 | gi 15805042 ref NC_001263.1 | 1611652 | 1611669 | 17 | <DR1591~DR1592>   |
| 18039 | gi 15805042 ref NC_001263.1 | 1621479 | 1621495 | 16 | >DR1598~DR1599>   |
| 17356 | gi 15805042 ref NC_001263.1 | 1624577 | 1624593 | 16 | <DR1601~DR1602>   |
| 18041 | gi 15805042 ref NC_001263.1 | 1629047 | 1629063 | 16 | >popP~DR1606>     |
| 18042 | gi 15805042 ref NC_001263.1 | 1641010 | 1641026 | 16 | <DR1619~DR1620<   |
| 18043 | gi 15805042 ref NC_001263.1 | 1656765 | 1656780 | 15 | <DR1631~DR1632>   |
| 18044 | gi 15805042 ref NC_001263.1 | 1661469 | 1661493 | 24 | <DR1634~DR1635>   |
| 18045 | gi 15805042 ref NC_001263.1 | 1661565 | 1661581 | 16 | <DR1634~DR1635>   |
| 18046 | gi 15805042 ref NC_001263.1 | 1671703 | 1671725 | 22 | >DR1647~DR1648<   |
| 17547 | gi 15805042 ref NC_001263.1 | 1676636 | 1676653 | 17 | <DR1652~DR1653>   |
| 5777  | gi 15805042 ref NC_001263.1 | 1678948 | 1678967 | 19 | >DR1654~DR1655>   |
| 2329  | gi 15805042 ref NC_001263.1 | 1700683 | 1700718 | 35 | >DR1674~DR1675>   |
| 17697 | gi 15805042 ref NC_001263.1 | 1724936 | 1724952 | 16 | <DR1701~DR1702<   |
| 18050 | gi 15805042 ref NC_001263.1 | 1728390 | 1728407 | 17 | <DR1704~DR1705<   |
| 17685 | gi 15805042 ref NC_001263.1 | 1771480 | 1771504 | 24 | >DR1742~DR1743<   |
| 18052 | gi 15805042 ref NC_001263.1 | 1771701 | 1771725 | 24 | 7 >DR1742~DR1743< |
| 18053 | gi 15805042 ref NC_001263.1 | 1776187 | 1776203 | 16 | <DR1747~DR1748>   |
| 18054 | gi 15805042 ref NC_001263.1 | 1781858 | 1781874 | 16 | <DR1753~DR1754>   |
| 18055 | gi 15805042 ref NC_001263.1 | 1809520 | 1809539 | 19 | >DR1779~DR1780>   |
| 18057 | gi 15805042 ref NC_001263.1 | 1851909 | 1851929 | 20 | <DR1825~DR1826<   |
| 18058 | gi 15805042 ref NC_001263.1 | 1868548 | 1868564 | 16 | >DR1841~DR1842<   |
| 17896 | gi 15805042 ref NC_001263.1 | 1886390 | 1886409 | 19 | >DR1863~DR1864<   |
| 18062 | gi 15805042 ref NC_001263.1 | 1903478 | 1903493 | 15 | <DR1882~DR1883>   |
| 5558  | gi 15805042 ref NC_001263.1 | 1904237 | 1904266 | 29 | >DR1883~DR1884<   |
| 18064 | gi 15805042 ref NC_001263.1 | 1904435 | 1904459 | 24 | 7 >DR1883~DR1884< |
| 18066 | gi 15805042 ref NC_001263.1 | 1915413 | 1915435 | 22 | >DR1895~DR1896>   |
| 17686 | gi 15805042 ref NC_001263.1 | 1915793 | 1915817 | 24 | >DR1896~DR1897<   |

|       |                             |         |         |     |                     |
|-------|-----------------------------|---------|---------|-----|---------------------|
| 3860  | gi 15805042 ref NC_001263.1 | 1923582 | 1923602 | 20  | >DR1904~DR1905<     |
| 5779  | gi 15805042 ref NC_001263.1 | 1949116 | 1949138 | 22  | <DR1927~DR1928<     |
| 17548 | gi 15805042 ref NC_001263.1 | 1953251 | 1953268 | 17  | <DR1931~DR1932>     |
| 17438 | gi 15805042 ref NC_001263.1 | 1956907 | 1956923 | 16  | >DR1936~DR1937<     |
| 17949 | gi 15805042 ref NC_001263.1 | 1981107 | 1981128 | 21  | >DR1960~DR1961>     |
| 18071 | gi 15805042 ref NC_001263.1 | 1986461 | 1986477 | 16  | <DR1964~DR1965<     |
| 18072 | gi 15805042 ref NC_001263.1 | 1988926 | 1988942 | 16  | >DR1967~DR1968<     |
| 18074 | gi 15805042 ref NC_001263.1 | 2025948 | 2025964 | 16  | <DR2005~DR2006<     |
| 18076 | gi 15805042 ref NC_001263.1 | 2032119 | 2032138 | 19  | >DR2013~DR2014<     |
| 18077 | gi 15805042 ref NC_001263.1 | 2053999 | 2054017 | 18  | <DR2038~DR2039<     |
| 18078 | gi 15805042 ref NC_001263.1 | 2054106 | 2054122 | 16  | <DR2038~DR2039<     |
| 18079 | gi 15805042 ref NC_001263.1 | 2062073 | 2062093 | 20  | <DR2049~DR2050<     |
| 18081 | gi 15805042 ref NC_001263.1 | 2068854 | 2068871 | 17  | >DR2053~DR2054<     |
| 18082 | gi 15805042 ref NC_001263.1 | 2069297 | 2069336 | 39  | <DR2054~DR2055>     |
| 16822 | gi 15805042 ref NC_001263.1 | 2099749 | 2099793 | 44  | <DR2087~DR2088<     |
| 18085 | gi 15805042 ref NC_001263.1 | 2118294 | 2118310 | 16  | >DR2108~tRNA-Leu-2< |
| 17273 | gi 15805042 ref NC_001263.1 | 2118674 | 2118693 | 19  | <tRNA-Leu-2~DR2109> |
| 18086 | gi 15805042 ref NC_001263.1 | 2130322 | 2130346 | 24  | >DR2126~DR2127>     |
| 4154  | gi 15805042 ref NC_001263.1 | 2132603 | 2132619 | 16  | >DR2129~DR2130<     |
| 17610 | gi 15805042 ref NC_001263.1 | 2142254 | 2142269 | 15  | <DR2139~DR2140>     |
| 5685  | gi 15805042 ref NC_001263.1 | 2144289 | 2144313 | 24  | >DR2141~DR2142<     |
| 18092 | gi 15805042 ref NC_001263.1 | 2165755 | 2165775 | 20  | <DR2168~DR2169<     |
| 18095 | gi 15805042 ref NC_001263.1 | 2173666 | 2173684 | 18  | >DR2175~DR2176>     |
| 17688 | gi 15805042 ref NC_001263.1 | 2197606 | 2197630 | 24  | >DR2198~DR2199>     |
| 17659 | gi 15805042 ref NC_001263.1 | 2199501 | 2199543 | 42  | >DR2199~DR2200<     |
| 18098 | gi 15805042 ref NC_001263.1 | 2199718 | 2199746 | 28  | >DR2199~DR2200<     |
| 5783  | gi 15805042 ref NC_001263.1 | 2228282 | 2228300 | 18  | >DR2232~DR2233<     |
| 5784  | gi 15805042 ref NC_001263.1 | 2231180 | 2231212 | 32  | >DR2235~DR2236<     |
| 18104 | gi 15805042 ref NC_001263.1 | 2246235 | 2246393 | 158 | <DRrrnaA23S~DR2253< |
| 16382 | gi 15805042 ref NC_001263.1 | 2246869 | 2246940 | 71  | <DRrrnaA23S~DR2253< |
| 18107 | gi 15805042 ref NC_001263.1 | 2247075 | 2247143 | 68  | <DRrrnaA23S~DR2253< |
| 16375 | gi 15805042 ref NC_001263.1 | 2248014 | 2248036 | 22  | <DRrrnaA23S~DR2253< |
| 17005 | gi 15805042 ref NC_001263.1 | 2248068 | 2248088 | 20  | <DRrrnaA23S~DR2253< |
| 18120 | gi 15805042 ref NC_001263.1 | 2259854 | 2259873 | 19  | <DR2263~DR2264<     |



|       |                             |         |         |     |                     |
|-------|-----------------------------|---------|---------|-----|---------------------|
| 18122 | gi 15805042 ref NC_001263.1 | 2271953 | 2272029 | 76  | >DR2273~DR2274>     |
| 17952 | gi 15805042 ref NC_001263.1 | 2314039 | 2314059 | 20  | >DR2314~DR2315<     |
| 18126 | gi 15805042 ref NC_001263.1 | 2315950 | 2315966 | 16  | <DR2316~DR2317>     |
| 17549 | gi 15805042 ref NC_001263.1 | 2321478 | 2321495 | 17  | <DR2322~DR2323>     |
| 1746  | gi 15805042 ref NC_001263.1 | 2329202 | 2329217 | 15  | >DR2330~DR2331>     |
| 17913 | gi 15805042 ref NC_001263.1 | 2334200 | 2334231 | 31  | <DR2335~DR2336<     |
| 18128 | gi 15805042 ref NC_001263.1 | 2351491 | 2351512 | 21  | >DR2352~DR2353>     |
| 2364  | gi 15805042 ref NC_001263.1 | 2364544 | 2364572 | 28  | 5 >DR2363a~DR2366<  |
| 17857 | gi 15805042 ref NC_001263.1 | 2387119 | 2387178 | 59  | <DR2385~DR2386<     |
| 18133 | gi 15805042 ref NC_001263.1 | 2404281 | 2404329 | 48  | >DR2402~DR2403<     |
| 18135 | gi 15805042 ref NC_001263.1 | 2406823 | 2406854 | 31  | <tRNA-Trp-1~DR2405> |
| 18136 | gi 15805042 ref NC_001263.1 | 2430227 | 2430242 | 15  | >DR2427~DR2428<     |
| 18137 | gi 15805042 ref NC_001263.1 | 2431585 | 2431602 | 17  | <DR2428~DR2429>     |
| 18138 | gi 15805042 ref NC_001263.1 | 2473197 | 2473212 | 15  | <DR2476~DR2477>     |
| 17457 | gi 15805042 ref NC_001263.1 | 2483042 | 2483058 | 16  | >DR2485~DR2486>     |
| 17467 | gi 15805042 ref NC_001263.1 | 2486621 | 2486673 | 52  | >DR2488~DR2489>     |
| 17597 | gi 15805042 ref NC_001263.1 | 2494184 | 2494200 | 16  | <DR2495~DR2496>     |
| 18153 | gi 15805042 ref NC_001263.1 | 2505703 | 2505718 | 15  | <DR2505~DR2506<     |
| 18157 | gi 15805042 ref NC_001263.1 | 2519074 | 2519091 | 17  | <DR2516~DR2517>     |
| 18159 | gi 15805042 ref NC_001263.1 | 2527078 | 2527094 | 16  | <DR2524~DR2525<     |
| 18163 | gi 15805042 ref NC_001263.1 | 2567674 | 2567689 | 15  | <DR2565~DR2566>     |
| 17387 | gi 15805042 ref NC_001263.1 | 2569003 | 2569026 | 23  | >DR2566~DR2567>     |
| 1     | gi 15805042 ref NC_001263.1 | 2579605 | 2579652 | 47  | <DR2576~DR2577<     |
| 18166 | gi 15805042 ref NC_001263.1 | 2585974 | 2586132 | 158 | <DRrrnaB23S~DR2580< |
| 16687 | gi 15805042 ref NC_001263.1 | 2586608 | 2586679 | 71  | <DRrrnaB23S~DR2580< |
| 18173 | gi 15805042 ref NC_001263.1 | 2586814 | 2586882 | 68  | <DRrrnaB23S~DR2580< |
| 18174 | gi 15805042 ref NC_001263.1 | 2587082 | 2587127 | 45  | <DRrrnaB23S~DR2580< |
| 16461 | gi 15805042 ref NC_001263.1 | 2587752 | 2587774 | 22  | <DRrrnaB23S~DR2580< |
| 17007 | gi 15805042 ref NC_001263.1 | 2587806 | 2587826 | 20  | <DRrrnaB23S~DR2580< |

## Supplementary Table 1b. Predicted sRNAs by SIPHT

| Locus Name              | UpGENE  |     | Edirecti distUp |           |             |         |         | distDnG |            | DnGENEnum |          | BLASTExp   |     | NumSearc  |
|-------------------------|---------|-----|-----------------|-----------|-------------|---------|---------|---------|------------|-----------|----------|------------|-----|-----------|
|                         | umber   | on  | GENE            | sRNAstart | end         | dirsRNA | lensRNA | ENE     | DnGENEdir. | ber       | sRNAtype | BLASTscore | ect | hesPredic |
| Candidate_20_NC_001263  | DR_0450 | >>> | 112             | 445674    | 445925 >>>  |         | 251     | 10 <<<  | DR_0451    | candidate | 206      | 0.00022    | 1   |           |
| Candidate_3_NC_001263   | DR_0693 | >>> | 166             | 709840    | 709988 >>>  |         | 148     | 33 >>>  | DR_0694    | candidate | 293      | 1.50E-09   | 3   |           |
| Candidate_24_NC_001263  | DR_0990 | >>> | 24              | 1007800   | 1007862 >>> |         | 62      | 369 <<< | DR_0991    | candidate | 256      | 5.20E-07   | 1   |           |
| Candidate_25_NC_001263  | DR_0990 | >>> | 321             | 1008097   | 1008156 >>> |         | 59      | 75 <<<  | DR_0991    | candidate | 231      | 1.10E-06   | 3   |           |
| Candidate_77_NC_001263  | DR_1061 | >>> | 6               | 1072952   | 1073087 <<< |         | 135     | 527 <<< | DR_1062    | candidate | 173      | 0.0026     | 1   |           |
| Candidate_31_NC_001263  | DR_1149 | >>> | 186             | 1159362   | 1159424 >>> |         | 62      | 198 >>> | DR_1150    | candidate | 335      | 8.10E-12   | 1   |           |
| Candidate_35_NC_001263  | DR_1354 | >>> | 37              | 1361960   | 1362193 >>> |         | 233     | 24 >>>  | DR_1355    | candidate | 168      | 0.0039     | 1   |           |
| Candidate_84_NC_001263  | DR_1354 | >>> | 37              | 1361960   | 1362035 >>> |         | 75      | 182 >>> | DR_1355    | candidate | 168      | 0.0039     | 1   |           |
| Candidate_36_NC_001263  | DR_1355 | >>> | 1               | 1363002   | 1363330 >>> |         | 328     | -6 >>>  | DR_1356    | candidate | 646      | 1.20E-25   | 1   |           |
| Candidate_85_NC_001263  | DR_1462 | <<< | 113             | 1475301   | 1475373 <<< |         | 72      | 130 <<< | DR_1463    | candidate | 181      | 0.00063    | 1   |           |
| Candidate_87_NC_001263  | DR_1515 | >>> | 44              | 1531402   | 1531584 >>> |         | 182     | 16 >>>  | DR_1516    | candidate | 172      | 0.00051    | 2   |           |
| Candidate_38_NC_001263  | DR_1523 | >>> | 590             | 1539187   | 1539280 >>> |         | 93      | 246 <<< | DR_1524    | candidate | 184      | 0.00086    | 2   |           |
| Candidate_40_NC_001263  | DR_1695 | >>> | 150             | 1718480   | 1718674 >>> |         | 194     | 80 >>>  | DR_1696    | candidate | 251      | 5.50E-08   | 1   |           |
| Candidate_5_NC_001263   | DR_1702 | <<< | 1               | 1725522   | 1725600 >>> |         | 78      | 240 <<< | DR_1703    | candidate | 233      | 6.70E-07   | 1   |           |
| Candidate_41_NC_001263  | DR_1714 | >>> | 20              | 1739125   | 1739360 >>> |         | 235     | 71 >>>  | DR_1715    | candidate | 265      | 1.40E-08   | 1   |           |
| Candidate_43_NC_001263  | DR_1742 | >>> | 35              | 1771472   | 1771512 <<< |         | 40      | 255 <<< | DR_1743    | candidate | 185      | 0.00014    | 4   |           |
| Candidate_47_NC_001263  | DR_1883 | >>> | 44              | 1904230   | 1904265 <<< |         | 35      | 246 <<< | DR_1884    | candidate | 200      | 2.80E-05   | 4   |           |
| Candidate_11_NC_001263  | DR_1883 | >>> | 71              | 1904257   | 1904495 <<< |         | 238     | 16 <<<  | DR_1884    | candidate | 306      | 1.70E-10   | 2   |           |
| Candidate_48_NC_001263  | DR_2058 | >>> | 5               | 2073196   | 2073481 >>> |         | 285     | 5 >>>   | DR_2059    | candidate | 175      | 0.00023    | 4   |           |
| Candidate_106_NC_001263 | DR_2175 | >>> | 66              | 2173720   | 2173802 >>> |         | 82      | 123 >>> | DR_2176    | candidate | 319      | 6.50E-11   | 3   |           |
| Candidate_56_NC_001263  | DR_2199 | >>> | 132             | 2199589   | 2199774 >>> |         | 185     | 16 <<<  | DR_2200    | candidate | 236      | 4.70E-07   | 2   |           |
| Candidate_55_NC_001263  | DR_2199 | >>> | 257             | 2199714   | 2199780 <<< |         | 66      | 10 <<<  | DR_2200    | candidate | 231      | 7.40E-07   | 2   |           |
| Candidate_8_NC_001263   | DR_2235 | >>> | -11             | 2231043   | 2231264 <<< |         | 221     | 149 <<< | DR_2236    | candidate | 405      | 8.80E-15   | 1   |           |
| Candidate_110_NC_001263 | DR_2546 | <<< | 105             | 2549548   | 2549736 >>> |         | 188     | -29 >>> | DR_2547    | candidate | 164      | 0.002      | 1   |           |
| Candidate_12_NC_001263  | DR_0034 | >>> | 32              | 34728     | 34782 >>>   |         | 54      | 46 >>>  | DR_0035    | candidate | 181      | 2.00E-09   | 3   |           |
| Candidate_115_NC_001263 | DR_0034 | >>> | 32              | 34728     | 34765 >>>   |         | 37      | 63 >>>  | DR_0035    | candidate | 181      | 2.00E-09   | 3   |           |
| Candidate_80_NC_001263  | DR_0113 | <<< | 4               | 113000    | 113035 >>>  |         | 35      | 183 <<< | DR_0114    | candidate | 169      | 0.001      | 1   |           |
| Candidate_13_NC_001263  | DR_0120 | <<< | 45              | 119390    | 119575 <<<  |         | 185     | 4 <<<   | DR_0121    | candidate | 279      | 4.70E-09   | 1   |           |
| Candidate_14_NC_001263  | DR_0122 | >>> | 154             | 121885    | 121976 >>>  |         | 91      | -33 <<< | DR_0123    | candidate | 157      | 0.0038     | 1   |           |
| Candidate_15_NC_001263  | DR_0144 | <<< | 119             | 143691    | 143793 >>>  |         | 102     | -44 >>> | DR_0145    | candidate | 195      | 6.80E-05   | 2   |           |
| Candidate_16_NC_001263  | DR_0153 | >>> | 2               | 154892    | 154979 >>>  |         | 87      | -14 >>> | DR_0154    | candidate | 189      | 0.00019    | 2   |           |
| Candidate_89_NC_001263  | DR_0157 | >>> | -2              | 158961    | 159033 <<<  |         | 72      | 109 >>> | DR_0158    | candidate | 170      | 0.00055    | 3   |           |
| Candidate_17_NC_001263  | DR_0166 | >>> | 13              | 169581    | 169644 >>>  |         | 63      | 233 >>> | DR_0167    | candidate | 154      | 0.0034     | 1   |           |
| Candidate_91_NC_001263  | DR_0166 | >>> | 14              | 169582    | 169688 <<<  |         | 106     | 189 >>> | DR_0167    | candidate | 154      | 0.0034     | 1   |           |
| Candidate_18_NC_001263  | DR_0198 | <<< | 18              | 202814    | 202884 <<<  |         | 70      | 23 <<<  | DR_0199    | candidate | 170      | 0.0022     | 3   |           |
| Candidate_1_NC_001263   | DR_0216 | <<< | 4               | 217429    | 217495 >>>  |         | 66      | 23 >>>  | DR_0217    | candidate | 165      | 0.0018     | 1   |           |
| Candidate_19_NC_001263  | DR_0404 | >>> | 91              | 407197    | 407315 >>>  |         | 118     | 3 <<<   | DR_0405    | candidate | 149      | 0.0045     | 1   |           |
| Candidate_116_NC_001263 | DR_0404 | >>> | 91              | 407197    | 407290 >>>  |         | 93      | 28 <<<  | DR_0405    | candidate | 149      | 0.0045     | 1   |           |
| Candidate_117_NC_001263 | DR_0432 | >>> | 27              | 431327    | 431480 >>>  |         | 153     | 62 >>>  | DR_0433    | candidate | 176      | 0.00032    | 4   |           |
| Candidate_118_NC_001263 | DR_0459 | >>> | 155             | 454792    | 454975 >>>  |         | 183     | -61 <<< | DR_0460    | candidate | 251      | 1.40E-07   | 1   |           |

|                         |             |     |         |             |     |         |         |               |     |          |   |
|-------------------------|-------------|-----|---------|-------------|-----|---------|---------|---------------|-----|----------|---|
| Candidate_119_NC_001263 | DR_0533 <<< | 179 | 535940  | 536037 >>>  | 97  | 126 <<< | DR_0534 | candidate     | 218 | 0.00017  | 1 |
| Candidate_120_NC_001263 | DR_0568 <<< | 95  | 576822  | 576863 <<<  | 41  | 19 >>>  | DR_t15  | candidate     | 246 | 1.30E-07 | 2 |
| Candidate_2_NC_001263   | DR_0605 <<< | 14  | 617656  | 617773 >>>  | 117 | 96 >>>  | DR_0606 | candidate     | 160 | 0.0013   | 3 |
| Candidate_121_NC_001263 | DR_0612 >>> | 40  | 624795  | 624909 <<<  | 114 | 179 <<< | DR_0613 | candidate     | 264 | 3.50E-08 | 1 |
| Candidate_21_NC_001263  | DR_0673 >>> | 38  | 683747  | 683782 >>>  | 35  | 174 >>> | DR_0674 | candidate     | 183 | 9.50E-05 | 1 |
| Candidate_122_NC_001263 | DR_0737 >>> | -65 | 751623  | 751863 <<<  | 240 | 8 >>>   | DR_0738 | candidate     | 184 | 0.00025  | 1 |
| Candidate_22_NC_001263  | DR_0774 >>> | 26  | 791576  | 791770 >>>  | 194 | 42 >>>  | DR_0775 | candidate     | 150 | 0.0047   | 1 |
| Candidate_123_NC_001263 | DR_0774 >>> | 26  | 791576  | 791745 >>>  | 169 | 67 >>>  | DR_0775 | candidate     | 150 | 0.0047   | 1 |
| Candidate_124_NC_001263 | DR_0868 <<< | -17 | 880670  | 880773 <<<  | 103 | 26 >>>  | DR_0869 | candidate     | 180 | 0.00021  | 4 |
| RNaseP_bact_a_NC_001263 | DR_0896 >>> | 78  | 904611  | 905082 >>>  | 471 | -19 <<< | DR_0897 | RNaseP_bact_a | 138 | 5.30E-56 | 2 |
| RNaseP_bact_a_NC_001263 | DR_0896 >>> | 78  | 904611  | 905057 >>>  | 446 | 6 <<<   | DR_0897 | RNaseP_bact_a | 138 | 5.30E-56 | 3 |
| Candidate_23_NC_001263  | DR_0960 >>> | 249 | 974213  | 974296 >>>  | 83  | 39 <<<  | DR_0961 | candidate     | 155 | 0.0047   | 1 |
| Candidate_26_NC_001263  | DR_0996 >>> | 1   | 1012254 | 1012379 >>> | 125 | -13 >>> | DR_0997 | candidate     | 168 | 0.00052  | 1 |
| Candidate_27_NC_001263  | DR_1013 >>> | 73  | 1026124 | 1026271 >>> | 147 | -16 <<< | DR_1014 | candidate     | 199 | 1.80E-05 | 1 |
| Candidate_74_NC_001263  | DR_1013 >>> | 73  | 1026124 | 1026240 >>> | 116 | 15 <<<  | DR_1014 | candidate     | 199 | 1.80E-05 | 1 |
| Candidate_75_NC_001263  | DR_1033 >>> | 6   | 1045625 | 1045804 >>> | 179 | 64 <<<  | DR_1034 | candidate     | 262 | 2.20E-08 | 1 |
| Candidate_28_NC_001263  | DR_1052 >>> | 37  | 1063849 | 1064008 <<< | 159 | 206 <<< | DR_1053 | candidate     | 219 | 7.00E-05 | 2 |
| Candidate_76_NC_001263  | DR_1055 <<< | 16  | 1066642 | 1066789 <<< | 147 | 36 <<<  | DR_1056 | candidate     | 374 | 3.60E-13 | 1 |
| Candidate_29_NC_001263  | DR_1092 >>> | 15  | 1100573 | 1100662 >>> | 89  | 480 >>> | DR_1093 | candidate     | 220 | 0.00055  | 2 |
| Candidate_79_NC_001263  | DR_1110 <<< | 19  | 1118433 | 1118558 <<< | 125 | 102 <<< | DR_1111 | candidate     | 182 | 0.00012  | 4 |
| Candidate_30_NC_001263  | DR_1110 <<< | 183 | 1118597 | 1118646 <<< | 49  | 14 <<<  | DR_1111 | candidate     | 168 | 0.00045  | 3 |
| Candidate_81_NC_001263  | DR_1190 >>> | 33  | 1199663 | 1199803 <<< | 140 | 51 >>>  | DR_1191 | candidate     | 205 | 8.70E-06 | 2 |
| Candidate_32_NC_001263  | DR_1197 >>> | -26 | 1205904 | 1205993 <<< | 89  | 7 <<<   | DR_1198 | candidate     | 224 | 1.10E-06 | 3 |
| Candidate_4_NC_001263   | DR_1198 <<< | 3   | 1207786 | 1207817 >>> | 31  | 256 <<< | DR_1199 | candidate     | 217 | 4.00E-06 | 1 |
| Candidate_82_NC_001263  | DR_1270 <<< | 26  | 1278091 | 1278324 <<< | 233 | 85 <<<  | DR_1271 | candidate     | 168 | 0.00055  | 2 |
| Candidate_83_NC_001263  | DR_1270 <<< | 67  | 1278132 | 1278324 <<< | 192 | 85 <<<  | DR_1271 | candidate     | 168 | 0.00055  | 2 |
| Candidate_33_NC_001263  | DR_1290 >>> | 21  | 1297698 | 1297852 <<< | 154 | 23 <<<  | DR_1291 | candidate     | 218 | 4.40E-06 | 2 |
| Candidate_34_NC_001263  | DR_1317 >>> | 19  | 1323299 | 1323351 >>> | 52  | 102 >>> | DR_1318 | candidate     | 157 | 0.0026   | 1 |
| Candidate_86_NC_001263  | DR_1482 <<< | 7   | 1496841 | 1496997 <<< | 156 | 263 >>> | DR_1483 | candidate     | 236 | 4.70E-07 | 2 |
| Candidate_37_NC_001263  | DR_1515 >>> | 44  | 1531402 | 1531612 >>> | 210 | -12 >>> | DR_1516 | candidate     | 172 | 0.00051  | 2 |
| Candidate_39_NC_001263  | DR_1523 >>> | 590 | 1539187 | 1539449 >>> | 262 | 77 <<<  | DR_1524 | candidate     | 184 | 0.00086  | 2 |
| Candidate_88_NC_001263  | DR_1560 <<< | -11 | 1579514 | 1579696 <<< | 182 | 0 <<<   | DR_1561 | candidate     | 338 | 1.00E-11 | 1 |
| Candidate_90_NC_001263  | DR_1626 >>> | 11  | 1649108 | 1649177 <<< | 69  | 109 >>> | DR_1627 | candidate     | 154 | 0.0034   | 1 |
| Candidate_42_NC_001263  | DR_1720 >>> | 1   | 1747031 | 1747121 >>> | 90  | -26 <<< | DR_1721 | candidate     | 176 | 0.00018  | 1 |
| Candidate_92_NC_001263  | DR_1730 >>> | 70  | 1759017 | 1759072 <<< | 55  | 37 >>>  | DR_1731 | candidate     | 191 | 7.20E-05 | 2 |
| Candidate_44_NC_001263  | DR_1742 >>> | 111 | 1771548 | 1771767 <<< | 219 | 0 <<<   | DR_1743 | candidate     | 180 | 0.00014  | 2 |
| Candidate_45_NC_001263  | DR_1777 >>> | 32  | 1807701 | 1807771 >>> | 70  | 98 >>>  | DR_1778 | candidate     | 311 | 1.80E-10 | 2 |
| Candidate_46_NC_001263  | DR_1777 >>> | 32  | 1807701 | 1807867 >>> | 166 | 2 >>>   | DR_1778 | candidate     | 311 | 1.80E-10 | 2 |
| Candidate_93_NC_001263  | DR_1777 >>> | 32  | 1807701 | 1807840 >>> | 139 | 29 >>>  | DR_1778 | candidate     | 311 | 1.80E-10 | 2 |
| Candidate_94_NC_001263  | DR_1791 <<< | 33  | 1821083 | 1821164 <<< | 81  | 81 <<<  | DR_1792 | candidate     | 170 | 0.00039  | 2 |
| Candidate_95_NC_001263  | DR_1795 <<< | 79  | 1824449 | 1824513 >>> | 64  | 61 >>>  | DR_1796 | candidate     | 154 | 0.0032   | 3 |
| Candidate_96_NC_001263  | DR_1816 <<< | 120 | 1842183 | 1842299 >>> | 116 | 44 >>>  | DR_1817 | candidate     | 196 | 2.20E-05 | 1 |
| Candidate_97_NC_001263  | DR_1853 <<< | 85  | 1877109 | 1877223 <<< | 114 | 36 <<<  | DR_1854 | candidate     | 216 | 4.30E-06 | 2 |
| Candidate_98_NC_001263  | DR_1913 >>> | 1   | 1934839 | 1935030 >>> | 191 | 240 >>> | DR_1914 | candidate     | 171 | 0.0012   | 1 |
| Candidate_99_NC_001263  | DR_1939 <<< | 852 | 1961392 | 1961460 >>> | 68  | 852 >>> | DR_1940 | candidate     | 241 | 5.80E-06 | 1 |

|                         |             |     |         |             |     |         |         |           |     |          |   |
|-------------------------|-------------|-----|---------|-------------|-----|---------|---------|-----------|-----|----------|---|
| Candidate_100_NC_001263 | DR_2007 <<< | 57  | 2026748 | 2026868 >>> | 120 | 17 >>>  | DR_2008 | candidate | 302 | 8.30E-10 | 2 |
| Candidate_10_NC_001263  | DR_2044 <<< | 126 | 2059614 | 2059652 <<< | 38  | 41 <<<  | DR_2045 | candidate | 221 | 3.60E-06 | 3 |
| Candidate_102_NC_001263 | DR_2049 <<< | 33  | 2062018 | 2062186 >>> | 168 | 9 <<<   | DR_2050 | candidate | 260 | 4.80E-08 | 2 |
| Candidate_101_NC_001263 | DR_2049 <<< | 87  | 2062072 | 2062136 <<< | 64  | 59 <<<  | DR_2050 | candidate | 273 | 1.40E-08 | 2 |
| Candidate_49_NC_001263  | DR_2097 >>> | 18  | 2108858 | 2108920 <<< | 62  | 0 <<<   | DR_2098 | candidate | 152 | 0.0039   | 4 |
| Candidate_50_NC_001263  | DR_2116 >>> | 30  | 2123286 | 2123333 >>> | 47  | 89 >>>  | DR_2117 | candidate | 169 | 0.00079  | 1 |
| Candidate_103_NC_001263 | DR_2141 >>> | 11  | 2144195 | 2144326 <<< | 131 | 35 <<<  | DR_2142 | candidate | 249 | 1.80E-07 | 2 |
| Candidate_51_NC_001263  | DR_2141 >>> | 97  | 2144281 | 2144326 <<< | 45  | 35 <<<  | DR_2142 | candidate | 249 | 1.80E-07 | 2 |
| Candidate_52_NC_001263  | DR_2146 >>> | 11  | 2148782 | 2148909 <<< | 127 | 171 <<< | DR_2147 | candidate | 157 | 0.0025   | 1 |
| Candidate_53_NC_001263  | DR_2164 >>> | 12  | 2161984 | 2162125 <<< | 141 | 78 <<<  | DR_2165 | candidate | 214 | 3.30E-06 | 1 |
| Candidate_104_NC_001263 | DR_2166 >>> | 43  | 2163698 | 2163817 >>> | 119 | 58 >>>  | DR_2167 | candidate | 199 | 3.10E-05 | 2 |
| Candidate_105_NC_001263 | DR_2173 <<< | 64  | 2170091 | 2170203 >>> | 112 | -46 >>> | DR_2174 | candidate | 186 | 6.60E-05 | 3 |
| Candidate_54_NC_001263  | DR_2193 >>> | 234 | 2190302 | 2190434 >>> | 132 | -61 >>> | DR_2194 | candidate | 181 | 0.0004   | 2 |
| Candidate_9_NC_001263   | DR_2209 <<< | 293 | 2208594 | 2208695 <<< | 101 | 90 >>>  | DR_2210 | candidate | 190 | 0.00018  | 4 |
| SRP_bact_NC_001263      | DR_2235 >>> | 79  | 2231133 | 2231275 >>> | 142 | 138 <<< | DR_2236 | SRP_bact  | 426 | 1.80E-15 | 4 |
| SRP_bact_NC_001263      | DR_2235 >>> | 79  | 2231133 | 2231319 >>> | 186 | 94 <<<  | DR_2236 | SRP_bact  | 426 | 1.80E-15 | 4 |
| SRP_bact_NC_001263      | DR_2235 >>> | 79  | 2231133 | 2231257 >>> | 124 | 156 <<< | DR_2236 | SRP_bact  | 426 | 1.80E-15 | 4 |
| SRP_bact_NC_001263      | DR_2235 >>> | 79  | 2231133 | 2231296 >>> | 163 | 117 <<< | DR_2236 | SRP_bact  | 426 | 1.80E-15 | 4 |
| Candidate_107_NC_001263 | DR_2240 <<< | 172 | 2234792 | 2234857 <<< | 65  | 7 >>>   | DR_2241 | candidate | 161 | 0.0014   | 1 |
| Candidate_57_NC_001263  | DR_r06 <<<  | 60  | 2287080 | 2287112 >>> | 32  | 228 <<< | DR_2288 | candidate | 317 | 8.30E-11 | 5 |
| Candidate_108_NC_001263 | DR_2305 >>> | 9   | 2304081 | 2304156 <<< | 75  | 27 <<<  | DR_2306 | candidate | 87  | 0.0032   | 3 |
| Candidate_58_NC_001263  | DR_2340 >>> | 47  | 2338934 | 2339097 >>> | 163 | -30 <<< | DR_2341 | candidate | 242 | 2.90E-07 | 1 |
| Candidate_109_NC_001263 | DR_2340 >>> | 47  | 2338934 | 2339071 >>> | 137 | -4 <<<  | DR_2341 | candidate | 242 | 2.90E-07 | 1 |
| Candidate_59_NC_001263  | DR_2462 >>> | 26  | 2458848 | 2458897 >>> | 49  | 203 >>> | DR_2463 | candidate | 156 | 0.0029   | 1 |
| Candidate_60_NC_001263  | DR_2462 >>> | 26  | 2458848 | 2458972 >>> | 124 | 128 >>> | DR_2463 | candidate | 156 | 0.0029   | 1 |
| Candidate_61_NC_001263  | DR_2526 >>> | 5   | 2530270 | 2530411 <<< | 141 | 26 >>>  | DR_t43  | candidate | 252 | 1.50E-07 | 2 |
| Candidate_62_NC_001263  | DR_2526 >>> | 41  | 2530306 | 2530354 >>> | 48  | 83 >>>  | DR_t43  | candidate | 239 | 6.70E-07 | 1 |
| Candidate_6_NC_001263   | DR_r09 <<<  | 78  | 2588017 | 2588183 >>> | 166 | 62 <<<  | DR_2580 | candidate | 187 | 8.90E-05 | 4 |
| Candidate_63_NC_001263  | DR_2594 >>> | 18  | 2601736 | 2601848 >>> | 112 | 60 <<<  | DR_2595 | candidate | 163 | 0.0047   | 1 |
| Candidate_64_NC_001263  | DR_2594 >>> | 18  | 2601736 | 2601830 >>> | 94  | 78 <<<  | DR_2595 | candidate | 163 | 0.0047   | 1 |
| Candidate_111_NC_001263 | DR_2606 >>> | 22  | 2615517 | 2615585 <<< | 68  | 397 <<< | DR_2607 | candidate | 189 | 0.00044  | 3 |
| Candidate_112_NC_001263 | DR_2606 >>> | 217 | 2615712 | 2615820 <<< | 108 | 162 <<< | DR_2607 | candidate | 180 | 0.0005   | 3 |
| Candidate_65_NC_001263  | DR_2606 >>> | 246 | 2615741 | 2615820 <<< | 79  | 162 <<< | DR_2607 | candidate | 180 | 0.0005   | 3 |
| Candidate_66_NC_001263  | DR_2606 >>> | 372 | 2615867 | 2615942 <<< | 75  | 40 <<<  | DR_2607 | candidate | 319 | 7.40E-11 | 3 |
| Candidate_67_NC_001263  | DR_2610 <<< | 55  | 2619300 | 2619403 <<< | 103 | 131 <<< | DR_2611 | candidate | 179 | 0.00024  | 1 |
| Candidate_68_NC_001263  | DR_2618 >>> | 41  | 2627873 | 2627916 >>> | 43  | 90 >>>  | DR_2619 | candidate | 166 | 0.00093  | 1 |
| Candidate_69_NC_001263  | DR_2624 >>> | 4   | 2635244 | 2635325 >>> | 81  | -15 <<< | DR_2625 | candidate | 198 | 4.60E-05 | 4 |
| Candidate_70_NC_001263  | DR_2626 >>> | 16  | 2638268 | 2638340 <<< | 72  | 341 <<< | DR_2627 | candidate | 188 | 0.0019   | 4 |
| Candidate_71_NC_001263  | DR_2626 >>> | 85  | 2638337 | 2638383 <<< | 46  | 298 <<< | DR_2627 | candidate | 181 | 0.00031  | 1 |
| Candidate_113_NC_001263 | DR_2626 >>> | 249 | 2638501 | 2638574 <<< | 73  | 107 <<< | DR_2627 | candidate | 228 | 8.00E-07 | 2 |
| Candidate_73_NC_001263  | DR_2633 >>> | 63  | 2644147 | 2644282 >>> | 135 | -19 >>> | DR_2634 | candidate | 277 | 1.40E-08 | 2 |
| Candidate_114_NC_001263 | DR_2633 >>> | 63  | 2644147 | 2644257 >>> | 110 | 6 >>>   | DR_2634 | candidate | 277 | 1.40E-08 | 2 |

## Supplementary Table 2. Probes for Northern blotting analysis

|       | Reverse                                            | Forward                                         | Secondary probe                            |
|-------|----------------------------------------------------|-------------------------------------------------|--------------------------------------------|
| Dsr1  | TTT CCT TCA GAG TAT TAC TCC A                      | T GGA GTA ATA CTC TGA AGG AAA                   | CAA ACG GTG CCC CTT TTC CTT CAG AGT A      |
| Dsr2  | CTC CTG GGA GTG TGA AAT CAA CA                     | TG TTG ATT TCA CAC TCC CAG GAG                  | TGT GAA ATC AAC AGA ATC CGC TGC CCA        |
| Dsr3  | CCC AAA GAC AAG AGA CGG AAA TT                     | AAT TTC CGT CTC TTG TCT TTG GG                  | CCT GTC GAT GAA TTT CCG TCT CTT GTC TTT    |
| Dsr4  | CCC CTT CCA GAC TTC TTT TCG T                      | A CGA AAA GAA GTC TGG AAG GGG                   |                                            |
| Dsr5  | CCG CCG AGC TTT GAG ACC CCC T                      | A GGG GGT CTC AAA GCT CGG CGG                   | TGA AGT TCT TCT TCT AAG CTC CGC CGA GCT TT |
| Dsr6  | TGG CAA CAG GCG TCC CAG ACA                        | GCC TGA TCA TCT GTC TGG GAC                     | AGC CTG ATC ATC TGT CTG GGA CGC CTG TT     |
| Dsr7  | CTG CGC CAG CTA AAG ACA CCG A                      | TCG GTG TCT TTA GCT GGC GCA G                   | GGC CCT TCA GCG TCG GTG TCT TTA GCT        |
| Dsr8  | GCG AAG TAA GAT TTT CAC TGA CAA G                  | CTT GTC AGT GAA AAT CTT ACT TCG C               |                                            |
| Dsr9  | GTG ATT CAC GTT CCG GCA AAG AA                     | TT CTT TGC CGG AAC GTG AAT CAC                  | GCC ATG TAT ACT TGT GAT TCA CGT TCC GGC    |
| Dsr10 | CAA AAA TCC CCT CCC ACG ACG GGG AGG G              | CAA AAC CCC CTC CCC GTC GTG GGA GGG GAT TTT TG  |                                            |
| Dsr11 | GAA CAG CCG TTG CCT GAT CCG ACT                    | AGT CGG ATC AGG CAA CGG CTG TTC                 | CCT GAT CCG ACT GAC GAC TGA GGA GTG ACA AC |
| Dsr12 | CAT GAA CCA GTA CGA TCT CAA                        | TTG AGA TCG TAC TGG TTC ATG                     | CGC TGA TGT TCG GGT TCA GGA TCA GGT T      |
| Dsr13 | ACT CCA CGA GTA TCA GGG CAA                        | GCA CTT CCT TGC CCT GAT ACT C                   |                                            |
| Dsr14 | CCG AAG TTC AGG ACA TTG AAG TGA                    | CCT CAC TTC AAT GTC CTG AAC                     |                                            |
| Dsr15 | GCA GTC AGC ATC AGT GTC TTT                        | CCT AAG ATG TGA CTC GCT ATG AA                  |                                            |
| Dsr16 | CGC ATG GCC TCT TTT CCT GCC                        | GGC AGG AAA AGA GGC CAT GCG                     |                                            |
| Dsr17 | CAT CAC AAG GTC GGG CCA TCA                        | TGA TGG CCC GAC CTT GTG ATG                     | AAT CTT GAT GGC CCG ACC TTG TGA TGA TTG C  |
| Dsr18 | ATT CAG TCT TTG TCA AGG CTA TGC                    | GCA TAG CCT TGA CAA AGA CTG AAT                 | CGC GAG TTG CTT CTG TGC TGT CCG CCG AAT    |
| Dsr19 | TTA TCC ACA GTG AAA CGT AGA CCT                    | AGG TCT ACG TTT CAC TGT GGA TAA                 | AAC GCT GAA CAG TCA TGC TTG AAA ATC CGC TT |
| Dsr20 | GCG GGG AAA CTC CTG GTC GCG                        | CGC GAC CAG GAG TTT CCC CGC                     | TCC TGG TCG CGC CTG ACC TGC TTT TTC GGC A  |
| Dsr21 | CTG TGT TCA CGC TTC GGG CC                         | GGC CCG AAG CGT GAA CAC AG                      | AGT GCC CGG CCC GAA GCG TGA ACA CAG T      |
| Dsr22 | CGG GAA TGT TCG CAA AGT CTT CGT C                  | GAC GAA GAC TTT GCG AAC ATT CCC G               |                                            |
| Dsr23 | CTC AGA AAC CTC GGG TTC AGT                        | TGC CGA CAC TGA ACC CGA GGT                     |                                            |
| Dsr24 | CCTGACCTTTAGTGTCTCGCGCTTGGTAGGG                    | TAC CAA GCG CGA GAC ACT AAA GGT C               |                                            |
| Dsr25 | GGT GTA GAC TTC AGG CAC CCA AAC ATC TCT            | AGA GAT GTT TGG GTG CCT GAA GTC TAC A           |                                            |
| Dsr26 | GGATACGAACTGCCCGCTAGTGACAGTGATCGT                  | ACGATCACTGTCACTAGGCGGGCAGTTCGTATCC              |                                            |
| Dsr27 | CTT GAG GCT TCT ATG ATC AAT TTC ATC GTC AGA CGA    | TCG TCT GAC GAT GAA ATT GAT CAT AGA AGC CTC AAG | TGA GCT ACA CCT TCT TCC GCA GCA ACC T      |
| Dsr28 | GAC CTT TAG ACC CTC TTC CCT TAG AAC TT             | AAG TTC TAA GGG AAG AGG GTC TAA AGG TC          | CCT TTA GAC CCT CTT CCC TTA GAA CTT TTC C  |
| Dsr29 | GTACAAGTTAGCGTGTGAGGCTCAGATTTTCCACC                | GGTGGAAAATCTGAGCCTCACACGCTAACTTGAC              |                                            |
| Dsr30 | AGA AAA CAG TTC TCG AAT GGT CAG TGG CGC AAG CTG CT | GGA CGA GGG CTG TCA GGT GCA CAC                 | TCC GAA CAC GCT GGT CCT AAG CCA TGC ACT    |
| Dsr31 | AAC AGT TCT CGA ATG GTC AGT GGC GCA A              | GGT TGA CGC TGA CCG GGA CAT AAA                 | AAA GGC CAG CAG CTT GCG CCA CTG ACC ATT    |
| Dsr32 | ATG AGG GCA GTC GAG ATG TAT TCC ATT GGG GT         | CCC AAT GGA ATA CAT CTC GAC TGC CCT CAT         |                                            |
| Dsr33 | TTT ATC CAG AGT CGG CGC AGG GAC C                  | GGT CCC TGC GCC GAC TCT GGA TAA A               | TGC ACG TGC CAG GGC CGA ACA CCA ACT CT     |
| Dsr34 | CGA CCC TCA ACC ACG GCC TGA CCA GCA T              | ATG CTG GTC AGG CCG TGG TTG AGG GTC G           |                                            |
| Dsr35 | GGT TGT TCT TGT TGA TTT CGG TCA TC                 | GA TGA CCG AAA TCA ACA AGA ACA ACC              | AGG CGT GCA GAT CTG GAT CAA CAA TTG GAC T  |
| Dsr36 | TAA GAC CTG CTT AGA AGC TT                         | CTT CTA AGC AGG TCT TAG CG                      |                                            |
| Dsr37 | GCC GCG ATT CCA GAG TTC GGA AGA T                  | GCC CAT CTT CCG AAC TCT GGA ATC G               |                                            |
| Dsr38 | CTG AGC GCA ATG CCT GAA CGT GT                     | ACA CGT TCA GGC ATT GCG CTC AG                  |                                            |
| Dsr39 | TTG GTG GTG AGG TCG AGG TCA GAC GAA TAC A          | T GTA TTC GTC TGA CCT CGA CCT CAC CAC CAA       | TCA TGA GCT TCC CAT GAG GTC ATG GCC T      |
| Dsr40 | AAG TGT GGC AAC CTA ATC GGC TTA CC                 | GGT AAG CCG ATT AGG TTG CCA CAC TT              | AAG CCG ATT AGG TTG CCA CAC TTG AGG CAT G  |
| Dsr41 | CAC CTC ACA CAA GCG AGA CGA CGA CAT GAA            | TTC ATG TCG TCG TCT CGC TTG TGT GAG GTG         |                                            |
| Dsr42 | CGCCTCGGACTCGAACCAGAACCC                           | GGGTTCTCGGTTTCGAGTCCGAGGCG                      |                                            |

|       |                                                     |                                                     |                                                |
|-------|-----------------------------------------------------|-----------------------------------------------------|------------------------------------------------|
| Dsr43 | GCGAGTGAGAACAGAATTTGATGTGTTG                        | TGG GTT GAG GGT TTC GCT GGA GGT                     |                                                |
| Dsr44 | CAC AGC TTT CGC CTG AAT GCC CGT CAC TC              | CGT TTG CTG GTC ACC GGG GAA CTT CTC C               | TAC ACT CTC AGA ACT TGA CTC TCA GGA CTT GCC AT |
| Dsr45 | CAA TCC ACT CTG ACA GGC CCC TGA CAG                 | CTG TCA GGG GCC TGT CAG AGT GGA TTG                 |                                                |
| Dsr46 | AAA GGA GTT ACG CAC GCT CTG GCC GTC CA              | TGG ACG GCC AGA GCG TGC GTA ACT CCT TT              | ATC ACG TCA AAG GAG TTA CGC ACG CTC TGG CCG T  |
| Dsr47 | CGC TCT GAG TCA AAG ACT CCG GCA GGC AGA A           | TTC TGC CTG CCG GAG TCT TTG ACT CAG AGC G           |                                                |
| Dsr48 | TGA ATC TGG CGA GCT TCC AGT AAC CGA CAG GCC A       | TGG CCT GTC GGT TAC TGG AAG CTC GCC AGA TTC A       | TCT CTG TTT TTG GCC TGT CGG TTA CTG GAA GCT    |
| Dsr49 | GGG TCT TTC TAT GGG CTA CAG CTC AG                  | CTG AGC TGT AGC CCA TAG AAA GAC CC                  |                                                |
| Dsr50 | CACAGTCGGCTACGTCGCCATGAAGGC                         | GCCTTCATGGCGACGTAGCCGACTGTG                         |                                                |
| Dsr51 | GCA GCC ACT CCA GAA ATT CAC TCA GAC CTT TCA         | TGA AAG GTC TGA GTG AAT TTC TGG AGT GGC TGC         |                                                |
| Dsr52 | CTT GTT GAG AAA GTT CTC AAA GAG CCG TTG GTC         | GAC CAA CGG CTC TTT GAG AAC TTT CTC AAC AAG         |                                                |
| Dsr53 | CGA ATA CTG CAC CTG AAC TTG TTC ACC ACA GAG GAG GTC | GAC CTC CTC TGT GGT GAA CAA GTT CAG GTG CAG TAT TCG |                                                |
| Dsr54 | GCGAGTCTGACCGGAGACTGTCC                             | GGACAGTCTCCGGTCAGACTCGC                             |                                                |
| Gsr1  | TGT TCT TGC TGG TGG GCT TCG TGG CGG TGA             | TCA CCG CCA CGA AGC CCA CCA GCA AGA ACA             |                                                |
| Gsr2  | CCA TGA AGG GCC TGC GCG AGT TGA TTG ATT G           | CAA TCA ATC AAC TCG CGC AGG CCC TTC ATG G           |                                                |
| Gsr3  | TCG CCC TGC CCC ACT TGA CCA AGC GCA GAT T           | AAT CTG CGC TTG GTC AAG TGG GGC AGG GCG A           |                                                |
| Gsr4  | AA AAA AGC CCC AGC CGG AGC CAG GGC                  | GCC CTG GCT CCG GCT GGG GCT TTT TT                  |                                                |
| Gsr5  | G CGG CGA CCA GCC GAA TCA CGT CGA AGG AAT TGC GAA   | TTC GCA ATT CCT TCG ACG TGA TTC GGC TGG TCG CCG C   |                                                |
| Gsr6  | A GCG GAG GGC CAG TGT TGG CGC CTC                   | GAG GCG CCA ACA CTG GCC CTC CGC T                   |                                                |
| Gsr7  | AAG CAG CGG CAC CCG GAA ATC ATC C                   | GGA TGA TTT CCG GGT GCC GCT GCT T                   |                                                |
| Gsr8  | CTC CTG CCC AAC CCA TCA TGG TTG GCC ATA G           | CTATGGCCAACCATGATGGGTTGGGCAGGAG                     |                                                |
| Gsr9  | AGT TAT CCA CAG TGA AAC GCG TGC CTG TGG ATA ACT     | AGTTATCCACAGGCACGCGTTTCACTGTGGATAACT                |                                                |
| Gsr10 | TAG TGT CTC GTG CTT GGT AGG GCC GAG GCG A           | TCGCCTCGGCCCTACCAAGCACGAGACACTA                     |                                                |

### Supplementary Table 3 RT-PCR Primers

Dsr1\_Left GTAGGCAGTGTCCACCCTTG  
Dsr1\_Right GTTTGGTGCCCTTCTTTTT  
Dsr1\_Gene\_left ACGCCGACTACGTCAAGAAC  
Dsr1\_Gene\_Right CGTCGTGCGGAAGTAGAACT  
Dsr2\_Left GCAGCGGATTCTGTTGATTT  
Dsr2\_Right GGGTAACTGTTTGC GGTTCTC  
Dsr3\_Left TATCAACGCGACAGGAAAAA  
Dsr3\_Right GACGGAAATTCATCGACAGG  
Dsr5\_Left GCTCGGCGGAGCTTAGAA  
Dsr5\_Right CCGGCCTGAAGTTCTTCTTC  
Dsr6\_Left CCTCAAGCGACCATCCTG  
Dsr6\_Right GTGCAAGACCCGACAGTG  
Dsr11\_Left CTGACAAAACAGTGGCTTCC  
Dsr11\_Right TGATCCGACTGACGACTGAG  
Dsr11\_Gene\_left GGCTACCTCGCCTACAAGG  
Dsr11\_Gene\_right GTCGCCTTGA ACTTCTGGAG  
Dsr12\_Left ATGTTTCGGTTTCAGGATCAG  
Dsr12\_Right GCACCGACAGCAACTATG  
Dsr12\_Gene\_left GGCCTTCTTGGTCTTCCACT  
Dsr12\_Gene\_Right ATCCTGAACCCGAACATCAG  
Dsr17\_Left CTCCAGACGAAAGCCTCATC  
Dsr17\_Right CCATCAAGATTCACCGCTCT  
Dsr18\_Left GGCTTTTTTCGTTTTGGGTTT  
Dsr18\_Right GACGTCAGGCCGATTATTCA  
Dsr18\_Gene\_left CGAGCACCTCGAACAAGAG  
Dsr18\_Gene\_Right GATCGGAAGCTCGATTTTGA  
Dsr19\_Left TTTGAAGCGGATTTTCAAGC  
Dsr19\_Right AAAACGCTGAACAGTCATGC  
Dsr19\_Gene\_left TTTTCATGGGGCAGTCACTC  
Dsr19\_Gene\_right GGCCTGTGGATTCTTGAGG  
Dsr20\_Left ACCTTCCCTGCCGAAAAAG  
Dsr20\_Right GCGGGGAAACTCCTGGTC  
Dsr27\_Left CATCTGCTGTTGGTCCCTTT  
Dsr27\_Right GGCGTGAGCTACACCTTCTT  
Dsr28\_Left TGATGCTCCTTCGGAAAAGT  
Dsr28\_Right CCTTTAGACCCTCTTCCCTTAGA  
Dsr28\_Gene\_left TCGGCTTCGTCTAGAACTT  
Dsr28\_Gene\_Right GTGCAGAAGAAGCTCGATCC  
Dsr30\_Left CTGGTCCTAAGCCATGCACT  
Dsr30\_Right GACCGTATGACTCCCAGACC  
Dsr31\_Left GCCACTGACCATTTCGAGAAC  
Dsr31\_Right CATAAGCCCCCAGAAAACAG  
Dsr33\_Left CTGCGCCGACTCTGGATA  
Dsr33\_Right ACGTGCAGGGTCACCTTTAT  
Dsr33\_Gene\_left GTCAGGTAGAGGCCGAACAC  
Dsr33\_Gene\_right ACGATTCTGGAGTGGTACGC  
Dsr35\_Left CGAACCGTTTTCGTCTGAAT  
Dsr35\_Right GCGTGCTTCAGTGTTTTGTC  
Dsr35\_Gene\_left TGAGGAGACGGATGACATTG  
Dsr35\_Gene\_right ATTGGGGAAAGTCGATGATG  
Dsr39\_Left TGACCTCATGGGAAGCTCAT  
Dsr39\_Right GTCAGGACGTGCAGGAAGAT  
Dsr40\_Left CAAAATGCTCAGCAATGGAA  
Dsr40\_Right TGGCAACCTAATCGGCTTAC

Dsr40\_Gene\_left ATCGCGTGTCTCTCTGCTTT  
Dsr40\_Gene\_Right GCTTGAAGCGACCCTCTCT  
Dsr44\_Left TGGCAAGTCCTGAGAGTCAA  
Dsr44\_Right TGGAGTAGTTTCGGTGCTGTT  
Dsr46\_Left CAGAGCGTGCCTAACTCCTT  
Dsr46\_Right AGCCGGATCACGTCAAAG  
Dsr46\_Gene\_left GAGATCAACACCGTGGAGGT  
Dsr46\_Gene\_Right CGGTCTTTTCGAGGTCGTC  
Dsr48\_Left CGCCTCTGCTCTCTCTGTTT  
Dsr48\_Right ATCTGGCGAGCTTCCAGTAA  
Dsr48\_Gene\_left ATTCAGCGCCACGTTGTAG  
Dsr48\_Gene\_right CCCGAGAGTGTCAAGGTGTT  
Dsr18\_gene\_left\_new CGAGCACCTCGAACAAGAG  
Dsr18\_gene\_right\_new GATCGGAAGCTCGATTTTGA  
Dsr19\_gene\_left\_new CCGGGTATTATCCCGTCTTG  
Dsr19\_gene\_right\_new AGCGTTTTACGGCGTCTATG  
Dsr46\_Gene\_left\_new TTACAAGCGTGACCTGATCG  
Dsr46\_Gene\_right\_new CGGTCTTTTCGAGGTCGTC  
Dsr48\_Gene\_left\_new GTCGGTGGCCTGAAAGTAGA  
Dsr48\_Gene\_right\_new GCGCCTACTTGATTTCCGTA  
Dsr8\_new AGGCCAGGGCTTGTCAGT  
Dsr13\_new GGGAGCCGCAGATGTTTCATTT  
Dsr10\_new GGG GTT TTG ACG TTC AGC  
Dsr37\_new AAA TGA ACA TCT GCG GCT CCC  
Dsr50\_new AGA TCA CCC TCA ACT TGA CCC  
Dsr51\_new GGG AAG GAT TGT CAG AAA AG  
Dsr52\_new GAC CAA CGG CTC TTT GAG A  
Dsr8\_left GTAGCGCTTCGAGACTTCGT  
Dsr8\_right TTCTGGAACGTGGTGAAGT  
Dsr8\_gene\_left GCGTCTTCGAACTTCTGCTT  
Dsr8\_gene\_right CGTCGAACAACTCATTACAGC  
Dsr10\_left1 TGC AGG GTC ACC TTT ATC CA  
Dsr10\_left2 ATAAAGGAAGGCGGGTCTT  
Dsr10\_right TGGACGAAAAGAAGTCTGGAA  
Dsr10\_dgene\_left GGTCGTCCAGATTGACGTG  
Dsr10\_dgene\_right GACCTGACGCTGCTTATCGT  
Dsr10\_ugene\_left GTAATGCACGCCGAGGTAAT  
Dsr10\_ugene\_right GAGCCAGGATTTTCCTTTCC  
Dsr3\_left\_new, GCCTCTTTCTGTGATGAA  
Dsr3\_left\_new, CTGCCCAAAGACAAGAGACG  
Dsr5\_left\_new, CGGCGGAGCTTAGAAGAAG  
Dsr5\_right\_new, GCC GAG GTT AAA GCC CTT  
Dsr7\_left\_new, CTATAGGGACGGATGCCAAA  
Dsr7\_right\_new, TAAAGACACCGACGCTGAAG  
Dsr9\_left\_new, TTG GAC AGG GGT TCT TTG C  
Dsr9\_right\_new, GATTCACGTTCCGGCAAA  
Dsr21\_left\_new, ACAGGGGACTCGCCTTC  
Dsr21\_right\_new, TTG TCG ATG CGC CCA CAG T  
Dsr48\_left\_new, AAT GCT GGC GCC TCT GCT  
Dsr48\_right\_new, AGCTTCCAGTAACCGACAGG

Dsr13\_left, GGAATGACCCCCGGTGGGTGTG  
Dsr13\_right, TTT ATC GGG ACA AAT GAA CAT CT  
Dsr13\_dgene\_left1, GGTCGCTGTTCTTTTCGTTT



Dsr13\_dgene\_left2, ATGCCACCGAAGATGTTGAT  
Dsr13\_dgene\_right1, ATTGCGCTGGATACCAAGTT  
Dsr13\_dgene\_right2, CTACGAAGCGCGTGAAGTC  
Dsr37\_left, GGTATCCCGCCCATCTTC  
Dsr37\_right, GCCGCGATTCCAGAGTTC  
Dsr37\_Dgene\_left1, CGGCACCACTGAACTCATT  
Dsr37\_Dgene\_right1, GCCACGAGGTCATTTTCAG  
Dsr37\_Dgene\_left2, ATCGAACCGCAGGAGAAGTA  
Dsr37\_Dgene\_right2, CACTCCTCGTCCACCCACT  
Dsr37\_Ugene\_left1, ACCTGACCTTCGACCTGATG  
Dsr37\_Ugene\_right1, ACAAACTCGCCCTTCTTGAC  
Dsr37\_Ugene\_left2, CGAGCTGCACCTGAGTATCC  
Dsr37\_Ugene\_right2, TGGGTCATGCTCAGAAACTG  
Dsr50\_left1, GTGATCTCGGCGTCTTTCTC  
Dsr50\_left2, GTGATCTCGGCGTCTTTCTC  
Dsr50\_right1, TCA AGT TGA GGG TGA TCT C  
Dsr50\_right2, GCATGATCAAGTACCGTAAGCA  
Dsr50\_Dgene\_left1, GGAAGTTGACGTTACGTTG  
Dsr50\_Dgene\_left2, CCACGTTGATCCAGTGACTC  
Dsr50\_Dgene\_right1, GACGACCTGACCCTTCAGAG  
Dsr50\_Dgene\_right2, CCACGTTGATCCAGTGACTC  
Dsr51\_left1, TGCCTTCTTTTCTGACAATCC  
Dsr51\_left2, ACGCCGTTAATTGCCTTCTT  
Dsr51\_right1, AAGACTTCAGGGGTGGGAAG  
Dsr51\_right2, GGTGGGAAGGATTGTCAGAA  
Dsr51\_Ugene\_left1, TGCTCGGTGTTTTGTACTCG  
Dsr51\_Ugene\_left2, AGAAGACCAGCTCGCTCAAG  
Dsr51\_Ugene\_right1, CCAGACTCAGGAAGGTCAGG  
Dsr51\_Ugene\_left2, AAGATGGCACAGCTTTTTGG  
Dsr52\_left1, GACCAACGGCTCTTTGAGAA  
Dsr52\_left2, CAGGGCGACCAACGGCTCTTTGA  
Dsr52\_right1, GCCGCTCTTTGTTGAGAAA  
Dsr52\_right2, GAA GCC TCC CCA GGG AGC  
Dsr52\_Ugene\_left1, AGGTCATGGCGTTCAAGAGT  
Dsr52\_Ugene\_left2, ACCAGAACACCGGCAAGA  
Dsr52\_Ugene\_right1, CGGGAGCATGAGTTTCATC  
Dsr52\_Ugene\_right2, GAC GAA ATT CGC GGC AAG G

## Supplementary Table 4. Probes for 5' RACE

|             |                                                           |
|-------------|-----------------------------------------------------------|
| 5'RACE_C1   | CAAGCAGAAGACGGCATACTGACTC CAG AAC TTT GGA AAC GAC GC      |
| 5'RACE_C2   | CAAGCAGAAGACGGCATACTGAGTC TCC TGG GAG TGT GAA ATC AAC A   |
| 5'RACE_C3   | CAAGCAGAAGACGGCATACTGACCG TCT CTT GTC TTT GGG CAG T       |
| 5'RACE_C4   | CAAGCAGAAGACGGCATACTGAGTC CCC TTC CAG ACT TCT TTT CGT     |
| 5'RACE_C5   | CAAGCAGAAGACGGCATACTGACCG AGC TTT GAG ACC CCC T           |
| 5'RACE_C6   | CAAGCAGAAGACGGCATACTGACAG CCT GAT CAT CTG TCT GGG AC      |
| 5'RACE_C7   | CAAGCAGAAGACGGCATACTGAGGT GTC TTT AGC TGG CGC A           |
| 5'RACE_C9   | CAAGCAGAAGACGGCATACTGAGTG ATT CAC GTT CCG GCA AAG AA      |
| 5'RACE_C11  | CAAGCAGAAGACGGCATACTGAAAC AGC CGT TGC CTG ATC C           |
| 5'RACE_C12  | CAAGCAGAAGACGGCATACTGAGGA TCA GGT TGA GAT CGT ACT GGT T   |
| 5'RACE_C14  | CAAGCAGAAGACGGCATACTGAGGG CCT CAC TTC AAT GTC CTG AA      |
| 5'RACE_C16  | CAAGCAGAAGACGGCATACTGACGC ATG GCC TCT TTT CCT GC          |
| 5'RACE_C17  | CAAGCAGAAGACGGCATACTGATGA TGG CCC GAC CTT GTG ATG         |
| 5'RACE_C18  | CAAGCAGAAGACGGCATACTGAGGG GTA TTC AGT CTT TGT CAA GGC T   |
| 5'RACE_C19  | CAAGCAGAAGACGGCATACTGACAC AGT GAA ACG TAG ACC TGT GGA     |
| 5'RACE_C20  | CAAGCAGAAGACGGCATACTGAAAA CTC CTG GTC GCG CCT             |
| 5'RACE_C21  | CAAGCAGAAGACGGCATACTGAGCC CGA AGC GTG AAC ACA             |
| 5'RACE_C26  | CAAGCAGAAGACGGCATACTGAAAC TGC CCG CCT AGT GAC A           |
| 5'RACE_C27  | CAAGCAGAAGACGGCATACTGATCA TCG TCA GAC GAC TGA TCC AGA T   |
| 5'RACE_C29  | CAAGCAGAAGACGGCATACTGATAC AAG TTA GCG TGT GAG GCT CAG A   |
| 5'RACE_C35  | CAAGCAGAAGACGGCATACTGACGG TTC GTG AAT AGG TTG TTC TTG T   |
| 5'RACE_C39  | CAAGCAGAAGACGGCATACTGAGGT GGT GAG GTC GAG GTC A           |
| 5'RACE_C42  | CAAGCAGAAGACGGCATACTGACCT CGG ACT CGA ACC GAG AA          |
| 5'RACE_C1B  | CAAGCAGAAGACGGCATACTGGA GGT GCC CCT TTT CCT TCA GAG TAT T |
| 5'RACE_C2A  | CAAGCAGAAGACGGCATACTGGA AAA TCA ACA GAA TCC GCT GCC CA    |
| 5'RACE_C4B  | CAAGCAGAAGACGGCATACTGGA GGT TCC AAC GGA CGG CTC A         |
| 5'RACE_C4A  | CAAGCAGAAGACGGCATACTGGA GAA GGG GAC GCC CGT TTT           |
| 5'RACE_C9A  | CAAGCAGAAGACGGCATACTGGA TCC AAC CCA TCC TGG TTG GC        |
| 5'RACE_C16B | CAAGCAGAAGACGGCATACTGGA GCC GTA TAA TAC CCG ATT CCG GAC   |
| 5'RACE_C19B | CAAGCAGAAGACGGCATACTGGA GAA CAG TCA TGC TTG AAA ATC CGC T |
| 5'RACE_C20A | CAAGCAGAAGACGGCATACTGGA GGC AGG GAA GGT GAG GAA AGT       |
| 5'RACE_C26A | CAAGCAGAAGACGGCATACTGGA GAT CGT CCG GTC TGG GAG AA        |
| 5'RACE_C7M  | CAAGCAGAAGACGGCATACTGGA CAG CTA AAG ACA CCG ACG CTG AA    |

|             |                                                      |
|-------------|------------------------------------------------------|
| 5'RACE_C17M | CAAGCAGAAGACGGCATACGA CAA TCA TCA CAA GGT CGG GCC AT |
| 5'RACE_C21M | CAAGCAGAAGACGGCATACGA CTG TGT TCA CGC TTC GGG C      |
| 5'RACE_C39B | CAAGCAGAAGACGGCATACGA GTT CGC GCA TGA GGG CTT T      |
| 5'RACE_Univ | AATGATACGGCGACCACCGCACTGCGTTTGCTGGCTTTGATG           |

## Supplementary Table 5. Potential sRNAs identified with deep sequencing and computational prediction

| Name  | Left end<br>Coordinate | Right end<br>Coordinate | Upstream<br>Gene | Direction | Downstream Gene | Direction                                                                                        |
|-------|------------------------|-------------------------|------------------|-----------|-----------------|--------------------------------------------------------------------------------------------------|
| Dsr1  | 2062149                | 2062238                 | DR_2049          | <<<       | DR_2050         | elongatifactor Tu <<<                                                                            |
| Dsr2  | 139794                 | 139847                  | DR_0140          | >>>       | DR_0141         | pseudogene >>>                                                                                   |
| Dsr3  | 1628175                | 1628269                 | DR_1604          | >>>       | DR_1605         | response regulator >>>                                                                           |
| Dsr4  | 1363180                | 1363292                 | DR_1355          | >>>       | DR_1356         | phosphatidylglycerophosphatase B-like protein ABC transporter ATP-binding protein >>>            |
| Dsr5  | 1133930                | 1134008                 | DR_1124          | >>>       | DR_1125         | SLH family protein hypothetical protein >>>                                                      |
| Dsr6  | 904902                 | 905055                  | DR_0896          | >>>       | DR_0897         | ribosomal large subunit hypothetical protein <<<                                                 |
| Dsr7  | 1678888                | 1678979                 | DR_1654          | >>>       | DR_1655         | hypothetical protein substrate-binding protein >>>                                               |
| Dsr8  | 1286346                | 1286483                 | DR_1279          | >>>       | DR_1280         | Mn family superoxide dismutase hypothetical protein >>>                                          |
| Dsr9  | 927150                 | 927218                  | rpoB D           | <<<       | DR_0913         | NA-directed RNA polymerase subunit hypothetical protein >>>                                      |
| Dsr10 | 1193477                | 1193597                 | DR_1184          | >>>       | DR_1185         | MutT/nudix family protein S-layer-like array-like protein <<<                                    |
| Dsr11 | 2378503                | 2378628                 | DR_2376          | >>>       | DR_2377         | TetR family transcriptional regulator hypothetical protein <<<                                   |
| Dsr12 | 99958                  | 100135                  | DR_0097          | <<<       | DR_0098         | hypothetical protein 30S ribosomal protein S6 succinyl-CoA synthetase subunit beta >>>           |
| Dsr13 | 1253227                | 1253295                 | DR_1246          | <<<       | DR_1247         | proline dipeptidase aat leu cyl/phenylalanyl-tRNA--protein transferase >>>                       |
| Dsr14 | 1737610                | 1737683                 | DR_1712          | <<<       | aat leu         | extracellular solute-binding protein serine/threonine protein kinase-like protein <<<            |
| Dsr15 | 1795976                | 1796045                 | DR_1768          | <<<       | DR_1769         | hypothetical protein N-acetylmuramoyl-L-alanine protein >>>                                      |
| Dsr16 | 2570268                | 2570308                 | DR_2567          | >>>       | DR_2568         | amidase-like protein amidase-like protein >>>                                                    |
| Dsr17 | 709900                 | 709987                  | DR_0692          | >>>       | DR_0694         | nitrogen regulatory protein P-II hypothetical protein >>>                                        |
| Dsr18 | 2615746                | 2615826                 | DR_2606          | >>>       | DR_2607         | primosomal protein n', putative protein D/E <<<                                                  |
| Dsr19 | 121873                 | 121947                  | DR_0122          | >>>       | DR_0123         | hypothetical protein isomerase <<<                                                               |
| Dsr20 | 904568                 | 904621                  | DR_0896          | >>>       | DR_0897         | ribosomal large subunit hypothetical protein <<<                                                 |
| Dsr21 | 2338982                | 2339068                 | DR_2340          | >>>       | DR_2341         | recombinase A birA bifunctional protein <<<                                                      |
| Dsr22 | 354490                 | 354549                  | DR_0353          | <<<       | DR_0354         | ribonuclease exodeoxyribonuclease III <<<                                                        |
| Dsr23 | 355330                 | 355425                  | DR_0353          | <<<       | DR_0354         | ribonuclease exodeoxyribonuclease III <<<                                                        |
| Dsr24 | 175430                 | 175497                  | DR_0173          | <<<       | DR_0174         | peptide chain release factor 2 50S ribosomal protein L13 >>>                                     |
| Dsr25 | 391550                 | 391605                  | DR_0392          | <<<       | DR_0393         | hypothetical protein elongatifactor G >>>                                                        |
| Dsr26 | 2119087                | 2119175                 | DR_2109          | >>>       | DR_2110         | ribosomal protein S14 30S ribosomal protein S8 >>>                                               |
| Dsr27 | 364745                 | 364815                  | DR_0363          | >>>       | DR_0364         | peptide ABC transporter periplasmic peptide-binding protein peptide ABC transporter permease >>> |
| Dsr28 | 714670                 | 714735                  | DR_0698          | >>>       | DR_0700         | v-type ATP synthase subunit C V-type ATP synthase subunit A >>>                                  |

|       |         |         |         |                                               |         |         |                                                                  |         |
|-------|---------|---------|---------|-----------------------------------------------|---------|---------|------------------------------------------------------------------|---------|
| Dsr29 | 989450  | 989575  | DR_0971 | electrtransfer flavoprotein subunit           | <<<     | DR_0972 | hypothetical protein                                             | >>>     |
| Dsr30 | 1948885 | 1949103 | DR_1927 | transposase                                   | <<<     | DR_1928 | glycerol kinase                                                  | <<<     |
| Dsr31 | 1996601 | 1996689 | DR_1974 | ATP-dependent protease LA                     | >>>     | DR_1975 | leucyl/phenylalanyl-tRNA--protein transferase                    | <<<     |
| Dsr32 | 863930  | 863995  | DR_0852 | hypothetical protein                          | >>>     | DR_0853 | gliding motility protein                                         | <<<     |
| Dsr33 | 1363038 | 1363086 | DR_1355 | phosphatidylglycerophosphatase B-like protein | >>>     | DR_1356 | ABC transporter ATP-binding protein                              | >>>     |
| Dsr34 | 2086115 | 2086205 | DR_2070 | membrane lipoprotein                          | >>>     | DR_2071 | phosphoglucosamine mutase                                        | <<<     |
| Dsr35 | 2208220 | 2208508 | DR_2209 | SudD-like protein                             | <<<     | DR_2210 | hypothetical protein                                             | >>>     |
| Dsr36 | 1077622 | 1077690 | DR_1066 | hypothetical protein                          | <<<     | DR_1067 | hypothetical protein                                             | <<<     |
| Dsr37 | 1207864 | 1207917 | DR_1198 | GTP-binding elongatifactor family             | <<<     | DR_1199 | protease I                                                       | <<<     |
| Dsr38 | 136856  | 137056  | DR_0138 | hypothetical protein                          | >>>     | DR_0139 | GTP-binding protein HflX                                         | >>>     |
| Dsr39 | 1028950 | 1029203 | DR_1016 | trmE tRNA modificatiGTPase                    | >>>     | DR_1017 | rRNA methylase                                                   | >>>     |
| Dsr40 | 1538050 | 1538245 | DR_1522 | pyrroline-5-carboxylate reductase             | >>>     | DR_1523 | putative transposase                                             | >>>     |
| Dsr41 | 428347  | 428441  | DR_0429 | cytochrome-like protein                       | >>>     | DR_0430 | rtcB protein                                                     | >>>     |
| Dsr42 | 214696  | 214774  | DR_0213 | hypothetical protein                          | <<<     | DR_0214 | hypothetical protein                                             | >>>     |
| Dsr43 | 1646233 | 1646390 | DR_1624 | RNA helicase                                  | <<<     | DR_1625 | amidase                                                          | >>>     |
| Dsr44 | 2598170 | 2598310 | DR_2590 | irABC transporter ATP-binding                 | >>>     | DR_2591 | hypothetical protein                                             | <<<     |
| Dsr45 | 218420  | 218572  | DR_0217 | thiosulfate sulfurtransferase deoxyguanosine  | >>>     | DR_0218 | hypothetical protein                                             | >>>     |
| Dsr46 | 301054  | 301123  | DR_0299 | kinase/deoxyadenosine kinase                  | <<<     | DR_0300 | serine protease Do, putative                                     | <<<     |
| Dsr47 | 302481  | 302680  | DR_0301 | hypothetical protein                          | <<<     | DR_0302 | glucosamine--fructose-6-phosphate aminotransferase (isomerizing) | >>>     |
| Dsr48 | 454581  | 454688  | DR_0459 | hypothetical protein                          | >>>     | DR_0460 | acetyl-CoA synthase                                              | <<<     |
| Dsr49 | 918726  | 918800  | DR_0900 | cell wall protein, putative                   | >>>     | DR_0911 | DNA-directed RNA polymerase, beta subunit                        | <<<     |
| Dsr50 | 1688729 | 1688850 | DR_1662 | L-threonine 3-dehydrogenase                   | <<<     | DR_1663 | hypothetical protein                                             | >>>     |
| Dsr51 | 1866869 | 1867060 | DR_1838 | GTP pyrophosphokinase                         | <<<     | DR_1839 | peptidyl-prolyl cis-trans isomerase, FKBP-type                   | >>>     |
| Dsr52 | 2025845 | 2025918 | DR_2005 | 50S ribosomal protein L35                     | <<<     | DR_2006 | hypothetical protein                                             | <<<     |
| Dsr53 | 2059450 | 2059620 | DR_2044 | 50S ribosomal protein L10                     | <<<     | DR_2045 | 50S ribosomal protein L1                                         | <<<     |
| Dsr54 | 2251638 | 2251754 | DR_225  | 5 hypothetical protein                        | <<<     | DR_2256 | transketolase                                                    | >>>     |
| Dsr55 | 5989    | 6207    | DR_0005 | hypothetical protein                          | forward | DR_0006 | metal-dependent hydrolase                                        | reverse |
| Dsr56 | 12749   | 12805   | DR_0011 | hypothetical protein                          | reverse | DR_0012 | chromosome partitioning protein                                  | reverse |
| Dsr57 | 13292   | 13339   | DR_0011 | hypothetical protein                          | reverse | DR_0012 | chromosome partitioning protein                                  | reverse |
| Dsr58 | 97386   | 97487   | DR_0095 | ABC transporter ATP-binding protein           | reverse | DR_0096 | ABC transporter ATP-binding protein                              | reverse |
| Dsr59 | 100775  | 101136  | DR_0099 | single-stranded DNA-binding protein           | forward | ssb     | single-stranded DNA-binding protein                              | forward |

|       |        |                |                                                                |         |         |                                                                                           |         |
|-------|--------|----------------|----------------------------------------------------------------|---------|---------|-------------------------------------------------------------------------------------------|---------|
| Dsr60 | 101394 | 101444 ssb     | single-stranded DNA-binding protein                            | forward | rpsR    | 30S ribosomal protein S18                                                                 | forward |
| Dsr61 | 103814 | 103865 DR_0104 | hypothetical protein                                           | forward | DR_0105 | hypothetical protein                                                                      | forward |
| Dsr62 | 119544 | 119592 DR_0120 | smf protein                                                    | reverse | DR_0121 | hypothetical protein                                                                      | reverse |
| Dsr63 | 125342 | 125408 DR_0127 | hypothetical protein                                           | reverse | DR_0128 | grpE protein                                                                              | reverse |
| Dsr64 | 150550 | 150641 DR_0149 | MutT/nudix family protein                                      | reverse | DR_0150 | hypothetical protein                                                                      | reverse |
| Dsr65 | 202798 | 202851 recR    | recombinatiprotein RecR                                        | reverse | DR_0199 | hypothetical protein                                                                      | reverse |
| Dsr66 | 231037 | 231096 DR_0231 | RNA methyltransferase                                          | forward | DR_0232 | hypothetical protein                                                                      | forward |
| Dsr67 | 253605 | 253664 DR_0255 | putative transposase<br>deoxyguanosine                         | reverse | DR_r03  | rRNA-5S ribosomal RNA                                                                     | forward |
| Dsr68 | 301054 | 301123 DR_0299 | kinase/deoxyadenosine kinase                                   | reverse | DR_0300 | serine protease Do, putative<br>glucosamine-fructose-6-phosphate                          | reverse |
| Dsr69 | 302481 | 302531 DR_0301 | hypothetical protein                                           | reverse | DR_0302 | aminotransferase                                                                          | forward |
| Dsr70 | 308096 | 308175 DR_0306 | 30S ribosomal protein S7                                       | forward | DR_0307 | elongatifactor G                                                                          | forward |
| Dsr71 | 330779 | 330905 DR_0334 | lipase                                                         | reverse | DR_0335 | ATP-dependent RNA helicase                                                                | forward |
| Dsr72 | 334219 | 334285 DR_0336 | fatty-acid-CoA ligase                                          | reverse | DR_0337 | hypothetical protein                                                                      | reverse |
| Dsr73 | 339425 | 339523 DR_t09  | tRNA-Leu                                                       | reverse | rpsO    | 30S ribosomal protein S15<br>cytochrome complex iron-sulfur<br>subunit                    | forward |
| Dsr74 | 339761 | 339820 rpsO    | 30S ribosomal protein S15<br>cytochrome c-type biogenesis heme | forward | DR_0342 |                                                                                           | reverse |
| Dsr75 | 346268 | 346327 DR_0348 | exporter protein C                                             | reverse | DR_0349 | ATP-dependent protease LA                                                                 | forward |
| Dsr76 | 348836 | 348902 DR_0349 | ATP-dependent protease LA                                      | forward | DR_0350 | hypothetical protein                                                                      | reverse |
| Dsr77 | 351490 | 351555 DR_0351 | hypothetical protein                                           | reverse | DR_0352 | hypothetical protein                                                                      | reverse |
| Dsr78 | 355607 | 355720 DR_0353 | ribonuclease                                                   | reverse | DR_0354 | exodeoxyribonuclease III                                                                  | reverse |
| Dsr79 | 357700 | 357752 DR_0356 | BioC methyltransferase                                         | reverse | DR_0357 | hypothetical protein<br>peptide ABC transporter<br>periplasmic peptide-bonding<br>protein | reverse |
| Dsr80 | 362697 | 362744 ddl     | D-alanyl-alanine synthetase A                                  | reverse | DR_0363 |                                                                                           | forward |
| Dsr81 | 391149 | 391251 DR_0392 | hypothetical protein                                           | reverse | DR_0393 | elongatifactor G<br>alpha-dextran endo-1,6,-alpha<br>glucosidase                          | forward |
| Dsr82 | 407179 | 407235 DR_0404 | hypothetical protein                                           | forward | DR_0405 |                                                                                           | reverse |
| Dsr83 | 412525 | 412604 DR_0408 | response regulator                                             | reverse | DR_0409 | hypothetical protein                                                                      | forward |
| Dsr84 | 421579 | 421633 DR_0420 | ATP-dependent helicase                                         | forward | DR_0421 | hypothetical protein                                                                      | reverse |
| Dsr85 | 454581 | 454688 DR_0459 | hypothetical protein                                           | forward | DR_0460 | acetyl-CoA synthase                                                                       | reverse |
| Dsr86 | 456821 | 456872 DR_0460 | acetyl-CoA synthase                                            | reverse | DR_0461 | pantothenate kinase                                                                       | forward |
| Dsr87 | 484405 | 484477 DR_0480 | C32 tRNA thiolase                                              | forward | DR_0481 | hypothetical protein                                                                      | reverse |
| Dsr88 | 520109 | 520164 DR_0513 | integrase                                                      | reverse | DR_0514 | hypothetical protein                                                                      | reverse |
| Dsr89 | 534853 | 534907 DR_0532 | hypothetical protein                                           | reverse | DR_0533 | hypothetical protein                                                                      | reverse |
| Dsr90 | 547706 | 547774 DR_0540 | hypothetical protein                                           | reverse | DR_0541 | hypothetical protein                                                                      | reverse |
| Dsr91 | 551572 | 551627 DR_0546 | hypothetical protein                                           | reverse | DR_0547 | hypothetical protein                                                                      | forward |

|        |         |                 |                                                                                 |         |         |                                                              |         |
|--------|---------|-----------------|---------------------------------------------------------------------------------|---------|---------|--------------------------------------------------------------|---------|
| Dsr92  | 560475  | 560548 DR_0554  | hypothetical protein                                                            | forward | DR_0555 | glutamate-1-semialdehyde<br>aminotransferase                 | forward |
| Dsr93  | 567642  | 567740 DR_0560  | hypothetical protein                                                            | reverse | DR_0561 | maltose ABC transporter                                      |         |
| Dsr94  | 574257  | 574479 DR_0566  | hypothetical protein                                                            | forward | DR_0567 | periplasmic maltose-binding protein                          | forward |
| Dsr95  | 611756  | 611822 DR_0599  | aminoglycoside N3-acetyltransferase                                             | reverse | DR_0600 | threonine hydratase                                          | reverse |
| Dsr96  | 611848  | 611911 DR_0599  | aminoglycoside N3-acetyltransferase                                             | reverse | DR_0600 | hypothetical protein                                         | reverse |
| Dsr97  | 619869  | 619939 groEL    | chaperonin GroEL                                                                | forward | DR_0608 | hypothetical protein                                         | forward |
| Dsr98  | 624856  | 624939 DR_0612  | arginine utilizatiprotein RocB                                                  | forward | DR_0613 | hypothetical protein                                         | reverse |
| Dsr99  | 646243  | 646302 DR_0630  | cell divisiprotein FtsA                                                         | forward | DR_0631 | cell divisiprotein FtsZ                                      | forward |
| Dsr100 | 646337  | 646398 DR_0630  | cell divisiprotein FtsA                                                         | forward | DR_0631 | cell divisiprotein FtsZ                                      | forward |
| Dsr101 | 647418  | 647514 DR_0631  | cell divisiprotein FtsZ                                                         | forward | DR_0632 | hypothetical protein                                         | reverse |
| Dsr102 | 656829  | 656892 DR_0644  | hypothetical protein                                                            | reverse | DR_0645 | molybdopterin-guanine<br>dinucleotide biosynthesis protein A | forward |
| Dsr103 | 691890  | 691977 DR_0684  | carbamoyl phosphate synthase small<br>subunit                                   | forward | DR_0685 | hypothetical protein                                         | forward |
| Dsr104 | 691997  | 692091 DR_0684  | carbamoyl phosphate synthase small<br>subunit                                   | forward | DR_0685 | hypothetical protein                                         | forward |
| Dsr105 | 707709  | 707783 DR_0691  | hypothetical protein                                                            | forward | DR_0692 | nitrogen regulatory protein P-II                             | forward |
| Dsr106 | 802843  | 802961 DR_0788  | branched-chain amino acid ABC<br>transporter periplasmic amino acid-            | reverse | DR_0789 | O-acetylserine (thiol)-lyase                                 | forward |
| Dsr107 | 814090  | 814241 DR_0799  | glucose-fructose oxidoreductase                                                 | forward | DR_0800 | hypothetical protein                                         | reverse |
| Dsr108 | 847984  | 848091 DR_0835  | hypothetical protein                                                            | forward | DR_0836 | hypothetical protein                                         | forward |
| Dsr109 | 876585  | 876655 DR_0864  | hypothetical protein                                                            | forward | DR_0865 | ferric uptake regulatiprotein                                | forward |
| Dsr110 | 918726  | 918787 DR_0910  | cell wall protein                                                               | forward | DR_0911 | DNA-directed RNA polymerase<br>subunit beta'                 | reverse |
| Dsr111 | 923490  | 923546 DR_0911  | DNA-directed RNA polymerase<br>subunit beta'                                    | reverse | rpoB    | DNA-directed RNA polymerase<br>subunit beta                  | reverse |
| Dsr112 | 928621  | 928709 DR_0914  | hypothetical protein                                                            | forward | DR_0915 | hypothetical protein                                         | reverse |
| Dsr113 | 928780  | 928834 DR_0914  | hypothetical protein                                                            | forward | DR_0915 | hypothetical protein                                         | reverse |
| Dsr114 | 959461  | 959617 DR_0944  | thioredoxin                                                                     | forward | DR_0945 | hypothetical protein                                         | reverse |
| Dsr115 | 968017  | 968091 DR_0955  | hypothetical protein                                                            | forward | DR_0956 | hypothetical protein                                         | reverse |
| Dsr116 | 972589  | 972698 DR_0959  | peptide ABC transporter permease<br>electrtransfer flavoprotein subunit<br>beta | reverse | DR_0960 | hypothetical protein                                         | forward |
| Dsr117 | 989604  | 989658 DR_0971  | beta                                                                            | reverse | DR_0972 | hypothetical protein                                         | forward |
| Dsr118 | 1066578 | 1066733 aspC    | aspartyl-tRNA synthetase                                                        | reverse | DR_1056 | hypothetical protein                                         | reverse |
| Dsr119 | 1073491 | 1073550 DR_1061 | NADPH quinone oxidoreductase                                                    | forward | DR_1062 | FemA-like protein                                            | reverse |
| Dsr120 | 1102258 | 1102356 DR_1093 | tryptophanyl-tRNA synthetase II                                                 | forward | DR_1094 | hypothetical protein                                         | reverse |

|        |         |         |         |                                                                                   |         |         |                                                                   |         |
|--------|---------|---------|---------|-----------------------------------------------------------------------------------|---------|---------|-------------------------------------------------------------------|---------|
| Dsr121 | 1130754 | 1130824 | DR_1122 | prephenate dehydrogenase<br>UDP-N-acetylglucosamine 1-<br>carboxyvinyltransferase | forward | DR_1123 | UDP-N-acetylglucosamine 1-<br>carboxyvinyltransferase             | reverse |
| Dsr122 | 1132136 | 1132227 | DR_1123 | carboxyvinyltransferase                                                           | reverse | DR_1124 | SLH family protein                                                | forward |
| Dsr123 | 1193472 | 1193540 | DR_1184 | MutT/nudix family protein                                                         | forward | DR_1185 | S-layer-like array-like protein                                   | reverse |
| Dsr124 | 1212826 | 1212880 | DR_1201 | hypothetical protein                                                              | forward | DR_1202 | hypothetical protein                                              | reverse |
| Dsr125 | 1225291 | 1225369 | DR_1217 | IcIR family transcriptional regulator                                             | forward | DR_1218 | hypothetical protein                                              | reverse |
| Dsr126 | 1232746 | 1232890 | DR_1225 | mannosyltransferase                                                               | reverse | DR_1226 | hypothetical protein                                              | forward |
| Dsr127 | 1245848 | 1245918 | DR_1237 | hypothetical protein<br>ribonucleoprotein Ro/SS-A-like<br>protein                 | reverse | DR_1238 | homocitrate synthase                                              | reverse |
| Dsr128 | 1270383 | 1270490 | DR_1262 | hypothetical protein                                                              | reverse | DR_1263 | hypothetical protein                                              | reverse |
| Dsr129 | 1271380 | 1271490 | DR_1263 | hypothetical protein                                                              | reverse | DR_1264 | hypothetical protein                                              | reverse |
| Dsr130 | 1275113 | 1275174 | DR_1266 | prolyl-tRNA synthetase                                                            | forward | DR_1267 | hypothetical protein                                              | forward |
| Dsr131 | 1290889 | 1290949 | DR_1283 | phosphoenolpyruvate carboxylase                                                   | forward | DR_1284 | hypothetical protein                                              | forward |
| Dsr132 | 1295996 | 1296062 | DR_1289 | DNA helicase RecQ                                                                 | reverse | DR_1290 | extracellular solute-binding protein                              | forward |
| Dsr133 | 1301289 | 1301344 | DR_1293 | hypothetical protein                                                              | forward | rpsP    | 30S ribosomal protein S16                                         | reverse |
| Dsr134 | 1301564 | 1301706 | rpsP    | 30S ribosomal protein S16                                                         | reverse | DR_1295 | PecM-like protein                                                 | forward |
| Dsr135 | 1302774 | 1302835 | DR_1295 | PecM-like protein                                                                 | forward | DR_1296 | transposase                                                       | forward |
| Dsr136 | 1304720 | 1304779 | DR_1297 | hypothetical protein                                                              | forward | DR_1298 | hypothetical protein                                              | forward |
| Dsr137 | 1362011 | 1362081 | uvrC    | excinuclease ABC subunit C                                                        | forward | DR_1355 | phosphatidylglycerophosphatase B-<br>like protein                 | forward |
| Dsr138 | 1394841 | 1394948 | DR_1388 | hypothetical protein                                                              | forward | DR_1389 | competence protein ComF                                           | forward |
| Dsr139 | 1442709 | 1442805 | DR_1439 | hypothetical protein                                                              | reverse | DR_1440 | cation-transporting ATPase                                        | reverse |
| Dsr140 | 1442861 | 1442933 | DR_1439 | hypothetical protein                                                              | reverse | DR_1440 | cation-transporting ATPase<br>ribose-phosphate                    | reverse |
| Dsr141 | 1458080 | 1458130 | DR_1455 | hypothetical protein                                                              | reverse | DR_1456 | pyrophosphokinase<br>ribose-phosphate                             | forward |
| Dsr142 | 1458163 | 1458230 | DR_1455 | hypothetical protein                                                              | reverse | DR_1456 | pyrophosphokinase                                                 | forward |
| Dsr143 | 1475283 | 1475385 | DR_1462 | hypothetical protein                                                              | reverse | DR_1463 | hypothetical protein                                              | reverse |
| Dsr144 | 1476946 | 1476997 | DR_1465 | hypothetical protein                                                              | forward | DR_1466 | hypothetical protein                                              | forward |
| Dsr145 | 1497161 | 1497239 | DR_1482 | 2-isopropylmalate synthase                                                        | reverse | DR_1483 | hypothetical protein                                              | forward |
| Dsr146 | 1529094 | 1529145 | rpsB    | 30S ribosomal protein S2                                                          | reverse | DR_1514 | 2-phosphoglycerate kinase                                         | forward |
| Dsr147 | 1531387 | 1531517 | DR_1515 | hypothetical protein                                                              | forward | DR_1516 | acetolactate synthase large subunit                               | forward |
| Dsr148 | 1556222 | 1556292 | DR_1538 | osmotically inducible protein C                                                   | forward | DR_1539 | hypothetical protein                                              | reverse |
| Dsr149 | 1569537 | 1569618 | DR_1551 | carboxyl-terminal protease                                                        | forward | DR_1552 | hypothetical protein                                              | reverse |
| Dsr150 | 1589905 | 1589979 | DR_1570 | peptide ABC transporter permease                                                  | reverse | DR_1571 | peptide ABC transporter<br>periplasmic peptide-bonding<br>protein | reverse |



|        |         |                 |                                     |         |         |                                     |         |  |
|--------|---------|-----------------|-------------------------------------|---------|---------|-------------------------------------|---------|--|
|        |         |                 | peptide ABC transporter periplasmic |         |         |                                     |         |  |
| Dsr151 | 1591756 | 1591833 DR_1571 | peptide-bonding protein             | reverse | DR_1572 | helicase-related protein            | forward |  |
| Dsr152 | 1601187 | 1601257 DR_1579 | hypothetical protein                | forward | DR_1580 | hypothetical protein                | forward |  |
| Dsr153 | 1641033 | 1641090 DR_1619 | hypothetical protein                | reverse | DR_1620 | ketoacyl reductase                  | reverse |  |
| Dsr154 | 1665468 | 1665520 malQ    | 4-alpha-glucanotransferase          | forward | DR_1638 | hypothetical protein                | forward |  |
| Dsr155 | 1688729 | 1688801 tdh     | L-threonine 3-dehydrogenase         | reverse | DR_1663 | hypothetical protein                | forward |  |
|        |         |                 |                                     |         |         | glucose-1-phosphate                 |         |  |
| Dsr156 | 1710710 | 1710787 DR_1688 | hypothetical protein                | reverse | DR_1689 | adenyltransferase                   | reverse |  |
|        |         |                 |                                     |         |         |                                     |         |  |
| Dsr157 | 1713889 | 1713963 DR_1691 | heat shock protein-like protein     | forward | DR_1692 | long-chain fatty-acid-CoA ligase    | forward |  |
| Dsr158 | 1721846 | 1721898 DR_1698 | tRNA-dihydrouridine synthase A      | forward | DR_1699 | hypothetical protein                | reverse |  |
| Dsr159 | 1732423 | 1732482 DR_1707 | DNA-directed DNA polymerase         | reverse | DR_1708 | hypothetical protein                | reverse |  |
| Dsr160 | 1751585 | 1751640 DR_1724 | hypothetical protein                | reverse | DR_1725 | WD repeat-containing protein        | reverse |  |
| Dsr161 | 1781881 | 1781936 DR_1753 | septum site-determining protein     | reverse | DR_1754 | hypothetical protein                | forward |  |
|        |         |                 |                                     |         |         |                                     |         |  |
| Dsr162 | 1793690 | 1793741 DR_1765 | hypothetical protein                | reverse | DR_1766 | anthranilate synthase component II  | forward |  |
| Dsr163 | 1814538 | 1814592 DR_1785 | 3-isopropylmalate dehydrogenase     | forward | DR_1786 | hypothetical protein                | forward |  |
| Dsr164 | 1831400 | 1831487 DR_1804 | hypothetical protein                | forward | DR_1805 | hypothetical protein                | reverse |  |
|        |         |                 |                                     |         |         | phospho-2-dehydro-3-                |         |  |
| Dsr165 | 1842183 | 1842349 DR_1816 | hypothetical protein                | reverse | DR_1817 | deoxyheptonate aldolase             | forward |  |
|        |         |                 |                                     |         |         | FKBP-type peptidyl-prolyl cis-trans |         |  |
| Dsr166 | 1866869 | 1867060 DR_1838 | GTP pyrophosphokinase               | reverse | DR_1839 | isomerase                           | forward |  |
| Dsr167 | 1886932 | 1887065 DR_1864 | hypothetical protein                | reverse | DR_1865 | cell divisiprotein MraZ             | forward |  |
| Dsr168 | 1917798 | 1917946 DR_1898 | recombinatifactor protein RarA      | forward | DR_1899 | hypothetical protein                | reverse |  |
|        |         |                 |                                     |         |         | GntR family transcriptional         |         |  |
| Dsr169 | 1923514 | 1923621 DR_1904 | hypothetical protein                | forward | DR_1905 | regulator                           | reverse |  |
| Dsr170 | 2002417 | 2002532 DR_1979 | hypothetical protein                | forward | DR_1980 | hypothetical protein                | forward |  |
| Dsr171 | 2016362 | 2016447 DR_1993 | hypothetical protein                | forward | DR_1994 | hypothetical protein                | reverse |  |
| Dsr172 | 2025845 | 2025918 rpml    | 50S ribosomal protein L35           | reverse | DR_2006 | hypothetical protein                | reverse |  |
| Dsr173 | 2031052 | 2031111 DR_2012 | hypothetical protein                | reverse | glpX    | fructose 1,6-bisphosphatase II      | forward |  |
| Dsr174 | 2059486 | 2059554 rplJ    | 50S ribosomal protein L10           | reverse | rplA    | 50S ribosomal protein L1            | reverse |  |
| Dsr175 | 2073391 | 2073457 DR_2058 | hypothetical protein                | forward | DR_2059 | glycyl-tRNA synthetase              | forward |  |
| Dsr176 | 2081138 | 2081197 DR_2065 | prepilin peptidase, type IV         | forward | DR_2066 | hypothetical protein                | reverse |  |
| Dsr177 | 2144282 | 2144344 DR_2141 | hypothetical protein                | forward | DR_2142 | hypothetical protein                | reverse |  |
| Dsr178 | 2170106 | 2170198 DR_2173 | hypothetical protein                | reverse | leuS    | leucyl-tRNA synthetase              | forward |  |
|        |         |                 |                                     |         |         | ribosomal protein S6                |         |  |
| Dsr179 | 2190322 | 2190394 DR_2193 | hypothetical protein                | forward | DR_2194 | modificatiprotein                   | forward |  |
|        |         |                 |                                     |         |         | tellurium resistance protein TerB   |         |  |
| Dsr180 | 2217634 | 2217694 DR_2219 | hypothetical protein                | forward | DR_2220 | (terB) putative                     | forward |  |

|        |         |         |          |                                                       |         |         |                                               |         |
|--------|---------|---------|----------|-------------------------------------------------------|---------|---------|-----------------------------------------------|---------|
| Dsr181 | 2231154 | 2231258 | DR_2235  | hypothetical protein                                  | forward | DR_2236 | hypothetical protein                          | reverse |
| Dsr182 | 2251638 | 2251754 | DR_2255  | hypothetical protein                                  | reverse | DR_2256 | transketolase                                 | forward |
| Dsr183 | 2272037 | 2272118 | DR_2273  | DNA topology modulatiprotein FlaR-like protein        | forward | DR_2274 | hypothetical protein                          | forward |
| Dsr184 | 2329057 | 2329171 | DR_2330  | ferredoxin                                            | forward | DR_2331 | hypothetical protein                          | forward |
| Dsr185 | 2364702 | 2364802 | DR_2363a | hypothetical protein                                  | forward | rpmF    | 50S ribosomal protein L32                     | reverse |
| Dsr186 | 2367919 | 2367969 | DR_2368  | hypothetical protein                                  | forward | DR_2369 | hypothetical protein                          | reverse |
| Dsr187 | 2376431 | 2376525 | DR_2374  | ribonucleoside-diphosphate reductase-like protein     | forward | DR_2375 | transcriptielongatifactor                     | forward |
| Dsr188 | 2399466 | 2399536 | DR_2395  | Na <sup>+</sup> /H <sup>+</sup> antiporter            | reverse | DR_2396 | TetR family transcriptional regulator         | forward |
| Dsr189 | 2420961 | 2421072 | DR_2417m | hypothetical protein                                  | reverse | DR_2418 | DNA-binding response regulator                | forward |
| Dsr190 | 2428535 | 2428609 | DR_2424  | putative transposase                                  | reverse | DR_2425 | hypothetical protein                          | reverse |
| Dsr191 | 2441816 | 2441897 | DR_2440  | nifR3 protein                                         | reverse | DR_2441 | hypothetical protein                          | forward |
| Dsr192 | 2460066 | 2460155 | DR_2463  | transport protein                                     | forward | DR_2464 | FKBP-type peptidyl-prolyl cis-trans isomerase | forward |
| Dsr193 | 2511570 | 2511640 | DR_2508  | hexagonally packed intermediate-layer surface protein | reverse | DR_2509 | hypothetical protein                          | reverse |
| Dsr194 | 2526760 | 2526836 | fimA     | adhesin B                                             | reverse | rpmB    | 50S ribosomal protein L28                     | reverse |
| Dsr195 | 2533724 | 2533831 | DR_2530  | hypothetical protein                                  | forward | DR_2531 | thiosulfate sulfurtransferase                 | forward |
| Dsr196 | 2549580 | 2549658 | DR_2546  | hypothetical protein                                  | reverse | DR_2547 | glutamyl-tRNA reductase                       | forward |
| Dsr197 | 2583287 | 2583340 | DR_2577  | S-layer protein                                       | reverse | tgt     | queuine tRNA-ribosyltransferase               | reverse |
| Dsr198 | 2590640 | 2590724 | DR_2582  | hypothetical protein                                  | reverse | DR_2583 | malate dehydrogenase                          | forward |
| Dsr199 | 2615530 | 2615685 | DR_2606  | primosomal protein n', putative                       | forward | DR_2607 | molybdenum cofactor biosynthesis protein D/E  | reverse |

**QRNA predicitions selected for Northern blottign analysis**

| Name  | Left end<br>Coordinat<br>e | Right end<br>Coordinat<br>e | size | Upstream<br>Gene   | Direction | Downstre<br>am Gene | Direction |
|-------|----------------------------|-----------------------------|------|--------------------|-----------|---------------------|-----------|
| Qpr1  | 904780                     | 904815                      |      | 35 >DR0896         | forward   | DR0897<             | reverse   |
| Qpr2  | 153714                     | 153731                      |      | 17 <DR0152         | reverse   | DR0153>             | forward   |
| Qpr3  | 747854                     | 747870                      |      | 16 <DR0731         | reverse   | DR0732>             | forward   |
| Qpr4  | 1956907                    | 1956923                     |      | 16 >DR1936         | forward   | DR1937<             | reverse   |
| Qpr5  | 213117                     | 213133                      |      | 16 <DR0211         | reverse   | DR0212<             | reverse   |
| Qpr6  | 2231180                    | 2231212                     |      | 32 >DR2235         | forward   | DR2236<             | reverse   |
| Qpr7  | 2364544                    | 2364572                     |      | 28 >DR2363a        | forward   | DR2366<             | reverse   |
| Qpr8  | 1904237                    | 1904266                     |      | 29 >DR1883         | forward   | DR1884<             | reverse   |
| Qpr9  | 1073181                    | 1073198                     |      | 17 >DR1061         | forward   | DR1062<             | reverse   |
| Qpr10 | 2248014                    | 2248036                     |      | <DRrrnaA<br>22 23S | reverse   | DR2253<<br>DRrrnaC2 | reverse   |
| Qpr11 | 250502                     | 250524                      |      | <tRNA-<br>22 Asp-3 | reverse   | 3S>                 | forward   |
| Qpr12 | 153639                     | 153670                      |      | 31 <DR0152         | reverse   | DR0153>             | forward   |
| Qpr13 | 2248068                    | 2248088                     |      | <DRrrnaA<br>20 23S | reverse   | DR2253<<br>DRrrnaC2 | reverse   |
| Qpr14 | 250450                     | 250470                      |      | <tRNA-<br>20 Asp-3 | reverse   | 3S>                 | forward   |
| Qpr15 | 2486621                    | 2486673                     |      | 52 >DR2488         | forward   | DR2489>             | forward   |
| Qpr16 | 54681                      | 54697                       |      | 16 <DR0058         | reverse   | DR0059>             | forward   |
| Qpr17 | 2199501                    | 2199543                     |      | 42 >DR2199         | forward   | DR2200<             | reverse   |
| Qpr18 | 1008098                    | 1008122                     |      | 24 >DR0990         | forward   | DR0991<             | reverse   |
| Qpr19 | 1771480                    | 1771504                     |      | 24 >DR1742         | forward   | DR1743<             | reverse   |
| Qpr20 | 1361988                    | 1362017                     |      | 29 >DR1354         | forward   | DR1355>             | forward   |
| Qpr21 | 1771701                    | 1771725                     |      | 24 >DR1742         | forward   | DR1743<             | reverse   |
| Qpr22 | 1904435                    | 1904459                     |      | 24 >DR1883         | forward   | DR1884<             | reverse   |
| Qpr23 | 2173666                    | 2173684                     |      | 18 >DR2175         | forward   | DR2176>             | forward   |
| Qpr24 | 2199718                    | 2199746                     |      | 28 >DR2199         | forward   | DR2200<             | reverse   |

|       |         |         |            |         |          |         |
|-------|---------|---------|------------|---------|----------|---------|
| Qpr25 | 2431585 | 2431602 | 17 <DR2428 | reverse | DR2429>  | forward |
|       |         |         | <tRNA-     |         | DRrrnaC2 |         |
| Qpr26 | 251149  | 251194  | 45 Asp-3   | reverse | 3S>      | forward |
| Qpr27 | 2519074 | 2519091 | 17 <DR2516 | reverse | DR2517>  | forward |
|       |         |         | <tRNA-     |         | DRrrnaC2 |         |
| Qpr28 | 252144  | 252302  | 158 Asp-3  | reverse | 3S>      | forward |
| Qpr29 | 331017  | 331034  | 17 <DR0334 | reverse | DR0335>  | forward |
| Qpr30 | 355149  | 355168  | 19 <DR0353 | reverse | DR0354<  | reverse |
| Qpr31 | 502175  | 502199  | 24 >DR0500 | forward | DR0501<  | reverse |
| Qpr32 | 578578  | 578595  | 17 >DR0569 | forward | DR0570>  | forward |
| Qpr33 | 732103  | 732123  | 20 <icsA   | reverse | DR0714<  | reverse |
| Qpr34 | 750899  | 750915  | 16 >DR0736 | forward | DR0737>  | forward |
| Qpr35 | 904620  | 904669  | 49 >DR0896 | forward | DR0897<  | reverse |

**SIPHT predicitions selected for Northern blottign analysis**

| Name  | UpGENumber | sRNAstart | end     | dirsRNA | lensRNA | UpGENEname                                                  | UpGENEdir. | DnGENEdir. | DnGENEnumber | DnGENEname                                                    |
|-------|------------|-----------|---------|---------|---------|-------------------------------------------------------------|------------|------------|--------------|---------------------------------------------------------------|
| Spr1  | DR_1462    | 1475301   | 1475373 | <<<     | 72      | hypothetical_protein                                        | <<<        | <<<        | DR_1463      | hypothetical_protein<br>(dimethylallyl)adenosine_tRNA_methylt |
| Spr2  | DR_1149    | 1159362   | 1159424 | >>>     | 62      | Na+/H+_antiporter                                           | >>>        | >>>        | DR_1150      | hiotransferas                                                 |
| Spr3  | DR_0990    | 1008097   | 1008156 | >>>     | 59      | acetoin_utilization_protein<br>lactoylglutathione_lyase-    | >>>        | <<<        | DR_0991      | class_V_aminotransferase                                      |
| Spr4  | DR_1695    | 1718480   | 1718674 | >>>     | 194     | like_protein                                                | >>>        | >>>        | DR_1696      | DNA_mismatch_repair_protein_MutL                              |
| Spr5  | DR_0450    | 445674    | 445925  | >>>     | 251     | hypothetical_protein                                        | >>>        | <<<        | DR_0451      | glutamine_synthase                                            |
| Spr6  | DR_0693    | 709840    | 709988  | >>>     | 148     | ammonium_transporter                                        | >>>        | >>>        | DR_0694      | hypothetical_protein                                          |
| Spr7  | DR_0990    | 1007800   | 1007862 | >>>     | 62      | acetoin_utilization_protein<br>NADPH_quinone_oxidoreductas  | >>>        | <<<        | DR_0991      | class_V_aminotransferase                                      |
| Spr8  | DR_1061    | 1072952   | 1073087 | <<<     | 135     | e                                                           | >>>        | <<<        | DR_1062      | FemA-like_protein<br>phosphatidylglycerophosphatase_B-        |
| Spr9  | DR_1354    | 1361960   | 1362193 | >>>     | 233     | excinuclease_ABC_subunit_C                                  | >>>        | >>>        | DR_1355      | like_protein<br>phosphatidylglycerophosphatase_B-             |
| Spr10 | DR_1354    | 1361960   | 1362035 | >>>     | 75      | excinuclease_ABC_subunit_C<br>phosphatidylglycerophosphatas | >>>        | >>>        | DR_1355      | like_protein                                                  |
| Spr11 | DR_1355    | 1363002   | 1363330 | >>>     | 328     | e_B-like_protein                                            | >>>        | >>>        | DR_1356      | ABC_transporter_ATP-binding_protein                           |
| Spr12 | DR_1515    | 1531402   | 1531584 | >>>     | 182     | hypothetical_protein                                        | >>>        | >>>        | DR_1516      | acetolactate_synthase_large_subunit                           |
| Spr13 | DR_1523    | 1539187   | 1539280 | >>>     | 93      | putative_transposase<br>kanamycin_resistance_protein-       | >>>        | <<<        | DR_1524      | cephalosporin_acylase<br>inositol_monophosphatase_family_prot |
| Spr14 | DR_1702    | 1725522   | 1725600 | >>>     | 78      | like_protein                                                | <<<        | <<<        | DR_1703      | ein                                                           |
| Spr15 | DR_1714    | 1739125   | 1739360 | >>>     | 235     | hypothetical_protein                                        | >>>        | >>>        | DR_1715      | hypothetical_protein                                          |
| Spr16 | DR_1742    | 1771472   | 1771512 | <<<     | 40      | glucose-6-phosphate_isomerase                               | >>>        | <<<        | DR_1743      | fosmidomycin_resistance_protein                               |
| Spr17 | DR_1883    | 1904230   | 1904265 | <<<     | 35      | hypothetical_protein                                        | >>>        | <<<        | DR_1884      | transcriptional_regulator                                     |
| Spr18 | DR_1883    | 1904257   | 1904495 | <<<     | 238     | hypothetical_protein                                        | >>>        | <<<        | DR_1884      | transcriptional_regulator                                     |
| Spr19 | DR_2058    | 2073196   | 2073481 | >>>     | 285     | hypothetical_protein                                        | >>>        | >>>        | DR_2059      | glycyl-tRNA_synthetase                                        |
| Spr20 | DR_2175    | 2173720   | 2173802 | >>>     | 82      | hypothetical_protein                                        | >>>        | >>>        | DR_2176      | hypothetical_protein                                          |
| Spr21 | DR_2199    | 2199589   | 2199774 | >>>     | 185     | ATP-<br>dependent_DNA_helicase_RecG-<br>like_protein        | >>>        | <<<        | DR_2200      | orotidine_5%60-<br>phosphate_decarboxylase                    |
| Spr22 | DR_2199    | 2199714   | 2199780 | <<<     | 66      | ATP-<br>dependent_DNA_helicase_RecG-<br>like_protein        | >>>        | <<<        | DR_2200      | orotidine_5%60-<br>phosphate_decarboxylase                    |
| Spr23 | DR_2235    | 2231043   | 2231264 | <<<     | 221     | hypothetical_protein                                        | >>>        | <<<        | DR_2236      | hypothetical_protein                                          |
| Spr24 | DR_2546    | 2549548   | 2549736 | >>>     | 188     | hypothetical_protein                                        | <<<        | >>>        | DR_2547      | glutamyl-tRNA_reductase                                       |

**Supplementary Table 6. sRNAs predicted by Rfam**

| Name                        | Left end<br>Coordinate | Right end<br>Coordinate | Size | Rfam<br>Prediction | Upstream<br>Gene                                | Direction | Downstre<br>am Gene            | Direction |
|-----------------------------|------------------------|-------------------------|------|--------------------|-------------------------------------------------|-----------|--------------------------------|-----------|
| gi 15805042 ref NC_001263.1 | 150539                 | 150734                  | 195  | Tbox               | DR_0149 MutT/nudix family protein               | <<<       | DR_0150 hypothetical protein   | <<<       |
| gi 15805042 ref NC_001263.1 | 2073216                | 2073494                 | 278  | T-Box              | DR_2058 hypothetical protein                    | >>>       | DR_2059 glycyl-tRNA synthetase | >>>       |
| gi 15805042 ref NC_001263.1 | 863318                 | 863553                  | 235  | tmRNA              | DR_0851 4-hydroxybenzoate octaprenyltransferase | <<<       | DR_00852 hypothetical protein  | >>>       |

## Supplementary Table 7. Target RNA prediction

| Gene    | Target protein                                | Binding ene | Binding sRNA |
|---------|-----------------------------------------------|-------------|--------------|
| DR_0095 | ABC transporter ATP-binding protein           | -12.51      | Dsr10        |
| DR_0095 | ABC transporter ATP-binding protein           | -14.02      | Dsr13        |
| ruvA    | Holliday junction DNA helicase RuvA           | -10.88      | Dsr13        |
| DR_2574 | transcriptional regulator                     | -10.15      | Dsr14rc      |
| DR_0601 | DNA primase                                   | -10.11      | Dsr14rc      |
| DR_0335 | ATP-dependent RNA helicase                    | -13.03      | Dsr25        |
| DR_1696 | DNA mismatch repair protein MutL              | -15.63      | Dsr26        |
| DR_1477 | DNA repair protein                            | -16.08      | Dsr26        |
| recA    | recombinase A                                 | -11.5       | Dsr26        |
| DR_0601 | DNA primase                                   | -12.05      | Dsr32rc      |
| DR_1648 | ABC transporter ATP-binding protein           | -19.16      | Dsr37        |
| DR_1105 | DNA repair protein RadA                       | -10.57      | Dsr37rc      |
| DR_0406 | ABC transporter ATP-binding protein           | -10.49      | Dsr8         |
| DR_1581 | ABC transporter ATP-binding protein           | -11.78      | Dsr8         |
| DR_0881 | cation transport system protein               | -15.25      | Dsr8         |
| DR_1105 | DNA repair protein RadA                       | -11.27      | Dsr8rc       |
| DR_1581 | ABC transporter ATP-binding protein           | -10         | NB-Dsr1      |
| DR_1572 | helicase-related protein                      | -10.62      | NB-Dsr1      |
| DR_0074 | TetR family transcriptional regulator         | -11.4       | NB-Dsr1      |
| DR_0475 | ABC transporter ATP-binding protein           | -11.99      | NB-Dsr11     |
| DR_0997 | CRP/FNR family transcriptional regulator      | -12.48      | NB-Dsr12     |
| DR_0416 | ppGpp-regulated growth inhibitor suppressor ( | -12.57      | NB-Dsr12     |
| DR_2145 | ABC transporter ATP-binding protein           | -10.01      | NB-Dsr17     |
| DR_0601 | DNA primase                                   | -12.32      | NB-Dsr17     |
| DR_2418 | DNA-binding response regulator                | -13.72      | NB-Dsr17     |
| ruvA    | Holliday junction DNA helicase RuvA           | -12.32      | NB-Dsr17     |
| DR_0743 | response regulator                            | -10.57      | NB-Dsr18     |
| recA    | recombinase A                                 | -13.29      | NB-Dsr2      |
| DR_0144 | transposase                                   | -28.76      | NB-Dsr2      |
| DR_0065 | ATP-dependent helicase                        | -11.89      | NB-Dsr3      |
| DR_2519 | MerR family transcriptional regulator         | -11.29      | NB-Dsr3      |
| DR_1927 | transposase                                   | -20.9       | NB-Dsr30     |
| DR_0440 | Holliday junction resolvase                   | -10.06      | NB-Dsr31     |
| DR_1379 |                                               | -15.29      | NB-Dsr33     |
| DR_1581 | ABC transporter ATP-binding protein           | -18.17      | NB-Dsr44     |
| DR_1126 | single-stranded-DNA-specific exonuclease      | -10.69      | NB-Dsr44     |
| DR_1379 | TetR family transcriptional regulator         | -10.79      | NB-Dsr44     |
